# Supplementary material for: Tyrosine phosphorylation of CARM1 promotes its enzymatic activity and alters its target specificity
Source: PubMed Central journal article supplement (PMC11035800; doi:10.1038/s41467-024-47689-4), 2024-04-22
Supplement: 41467_2024_47689_MOESM1_ESM.pdf [file 41467_2024_47689_MOESM1_ESM.pdf]

## **Supplementary information**

### **Tyrosine phosphorylation of CARM1 promotes its enzymatic activity and alters its target specificity**

Hidehiro Itonaga, Adnan K. Mookhtiar, Sarah M. Greenblatt, Fan Liu, Concepcion Martinez, Daniel Bilbao, Masai Rains, Pierre-Jacques Hamard, Jun Sun, Afoma C. Umeano, Stephanie Duffort, Chuan Chen, Na Man, Gloria Mas, Luca Tottone, Tulasigeri Totiger, Terrence Bradley, Justin Taylor, Stephan Schürer, and Stephen D. Nimer

**1. Supplementary Figure**

**2. Supplementary Tables (Key resource table)**

**3. Supplementary reference**

# 1. Supplementary Figure Supplementary Figure 1.

**A**

```

→
MAAAAAAVGP GAGGAGSAVP GGAGPCATVS VFPGAR LLTI GDANGEIQRH
AEQQALRLEV RAGPDSAGIA LYSHEDVGVF KCSVSRETEC SRVGKQSFII
TLGCNSVLIQ FATPNDFCSF YNILKTCRGH TLE RSVFSER TESSAVQVF
QFYGYLSQQQ NMMODYVRTG TYQRAILQNH TDFKDKIVLD VGCGSGILSF
FAAQAGARKI YAVEASTMAQ HAEVLVKSNN LTDRIVVI PG KVEEVSLPEQ
VDIIISEPMG YMLFNERMLE SYLHAKKYLK PSGNMFPTIG DVHLAPPTDE
QLYMEQFTKA NFWYQPSFHG VDLSALRGAA VDEYFRQPVV DTFDIRILMA
KSVKTYTNFL EAKEGDLHRI EIPFKFHMLH SGLVHGLAFW FDVAFIGSIM
TVWLSTAPTE PLTHWYQVRC LFSQPLFAKA GDTLSGTCLL IANKROSYDI
SIVAQVDQTG SKSSNLLDLK NPPFRYTGTT PSPPPGSHYT SPSENWNTG
STYNLSSGMA VAGMPTAYDL SSVIASGSSV GHNNLIPLAN TGI VNHHTSR
MGSIMSTGIV QGSSGAQGS GGGSTSAHYAV NSQFTMGGPA ISMASPMSIP
→

```

**B**

149

|                     |   |   |   |   |   |   |   |   |   |   |   |   |   |   |   |   |   |   |   |   |   |   |   |   |   |   |   |   |   |   |   |   |   |   |
|---------------------|---|---|---|---|---|---|---|---|---|---|---|---|---|---|---|---|---|---|---|---|---|---|---|---|---|---|---|---|---|---|---|---|---|---|
| Human               | R | S | V | F | S | E | R | T | E | E | S | S | A | V | Q | Y | F | Q | F | Y | G | Y | L | S | Q | Q | Q | N | M | M | Q | D | Y | V |
| Chimpanzee          | R | S | V | F | S | E | R | T | E | E | S | S | A | V | Q | Y | F | Q | F | Y | G | Y | L | S | Q | Q | Q | N | M | M | Q | D | Y | V |
| Rhesus macaque      | R | S | V | F | S | E | R | T | E | E | S | S | A | V | Q | Y | F | Q | F | Y | G | Y | L | S | Q | Q | Q | N | M | M | Q | D | Y | V |
| Pig                 | R | S | V | F | S | E | R | T | E | E | S | S | A | V | Q | Y | F | Q | F | Y | G | Y | L | S | Q | Q | Q | N | M | M | Q | D | Y | V |
| Dog                 | R | S | V | F | S | E | R | T | E | E | S | S | A | V | Q | Y | F | Q | F | Y | G | Y | L | S | Q | Q | Q | N | M | M | Q | D | Y | V |
| Cat                 | R | S | V | F | S | E | R | T | E | E | S | S | A | V | Q | Y | F | Q | F | Y | G | Y | L | S | Q | Q | Q | N | M | M | Q | D | Y | V |
| Horse               | R | S | V | F | S | E | R | T | E | E | S | S | A | V | Q | Y | F | Q | F | Y | G | Y | L | S | Q | Q | Q | N | M | M | Q | D | Y | V |
| African elephant    | R | S | V | F | S | E | R | T | E | E | S | S | A | V | Q | Y | F | Q | F | Y | G | Y | L | S | Q | Q | Q | N | M | M | Q | D | Y | V |
| Sheep               | R | S | V | F | S | E | R | T | E | E | S | S | A | V | Q | Y | F | Q | F | Y | G | Y | L | S | Q | Q | Q | N | M | M | Q | D | Y | V |
| Rabbit              | R | S | V | F | S | E | R | T | E | E | S | S | A | V | Q | Y | F | Q | F | Y | G | Y | L | S | Q | Q | Q | N | M | M | Q | D | Y | V |
| Rat                 | R | S | V | F | S | E | R | T | E | E | S | S | A | V | Q | Y | F | Q | F | Y | G | Y | L | S | Q | Q | Q | N | M | M | Q | D | Y | V |
| Mouse               | R | S | V | F | S | E | R | T | E | E | S | S | A | V | Q | Y | F | Q | F | Y | G | Y | L | S | Q | Q | Q | N | M | M | Q | D | Y | V |
| Opossum             | R | S | V | F | S | E | R | T | E | E | S | S | A | V | Q | Y | F | Q | F | Y | G | Y | L | S | Q | Q | Q | N | M | M | Q | D | Y | V |
| Zebrafish           | R | S | V | F | S | E | R | T | E | E | S | S | A | V | Q | Y | F | Q | F | Y | G | Y | L | S | Q | Q | Q | N | M | M | Q | D | Y | V |
| African clawed frog | R | S | V | F | S | E | R | T | E | E | S | S | A | V | Q | Y | F | Q | F | Y | G | Y | L | S | Q | Q | Q | N | M | M | Q | D | Y | V |

**C**

334

|                     |   |   |   |   |   |   |   |   |   |   |   |   |   |   |   |   |   |   |   |   |   |   |   |   |   |   |   |   |   |   |   |   |   |   |
|---------------------|---|---|---|---|---|---|---|---|---|---|---|---|---|---|---|---|---|---|---|---|---|---|---|---|---|---|---|---|---|---|---|---|---|---|
| Human               | H | G | V | D | L | S | A | L | T | G | A | A | V | D | E | Y | F | R | Q | P | V | V | D | T | F | D | I | R | I | L | M | A | K | S |
| Chimpanzee          | H | G | V | D | L | S | A | L | T | G | A | A | V | D | E | Y | F | R | Q | P | V | V | D | T | F | D | I | R | I | L | M | A | K | S |
| Rhesus macaque      | H | G | V | D | L | S | A | L | T | G | A | A | V | D | E | Y | F | R | Q | P | V | V | D | T | F | D | I | R | I | L | M | A | K | S |
| Pig                 | H | G | V | D | L | S | A | L | T | G | A | A | V | D | E | Y | F | R | Q | P | V | V | D | T | F | D | I | R | I | L | M | A | K | S |
| Dog                 | H | G | V | D | L | S | A | L | T | G | A | A | V | D | E | Y | F | R | Q | P | V | V | D | T | F | D | I | R | I | L | M | A | K | S |
| Cat                 | H | G | V | D | L | S | A | L | T | G | A | A | V | D | E | Y | F | R | Q | P | V | V | D | T | F | D | I | R | I | L | M | A | K | S |
| Horse               | H | G | V | D | L | S | A | L | T | G | A | A | V | D | E | Y | F | R | Q | P | V | V | D | T | F | D | I | R | I | L | M | A | K | S |
| African elephant    | H | G | V | D | L | S | A | L | T | G | A | A | V | D | E | Y | F | R | Q | P | V | V | D | T | F | D | I | R | I | L | M | A | K | S |
| Sheep               | H | G | V | D | L | S | A | L | T | G | A | A | V | D | E | Y | F | R | Q | P | V | V | D | T | F | D | I | R | I | L | M | A | K | S |
| Rabbit              | H | G | V | D | L | S | A | L | T | G | A | A | V | D | E | Y | F | R | Q | P | V | V | D | T | F | D | I | R | I | L | M | A | K | S |
| Rat                 | H | G | V | D | L | S | A | L | T | G | A | A | V | D | E | Y | F | R | Q | P | V | V | D | T | F | D | I | R | I | L | M | A | K | S |
| Mouse               | H | G | V | D | L | S | A | L | T | G | A | A | V | D | E | Y | F | R | Q | P | V | V | D | T | F | D | I | R | I | L | M | A | K | S |
| Opossum             | H | G | V | D | L | S | A | L | T | G | A | A | V | D | E | Y | F | R | Q | P | V | V | D | T | F | D | I | R | I | L | M | A | K | S |
| Zebrafish           | H | G | V | D | L | S | A | L | T | G | A | A | V | D | E | Y | F | R | Q | P | I | V | D | T | F | D | I | R | I | L | M | A | K | S |
| African clawed frog | H | G | V | D | L | S | A | L | T | G | A | A | V | D | E | Y | F | R | Q | P | I | V | D | T | F | D | I | R | I | L | M | A | K | S |

## Supplementary Figure 1. Primary sequence alignment of CARM1 protein.

(A) The coverage rate of mass spectrometry analysis is 48% of full-length human CARM1 protein (indicating yellow or green marked residues), in which we checked 16 out of 20 tyrosine residues.

Sequence alignment around tyrosine-149 (Y149) (B) and tyrosine-334 (Y334) (C) in CARM1. These alignments shown are evolutionally conserved, from African clawed frog to human.

## Supplementary Figure 2.

**A**

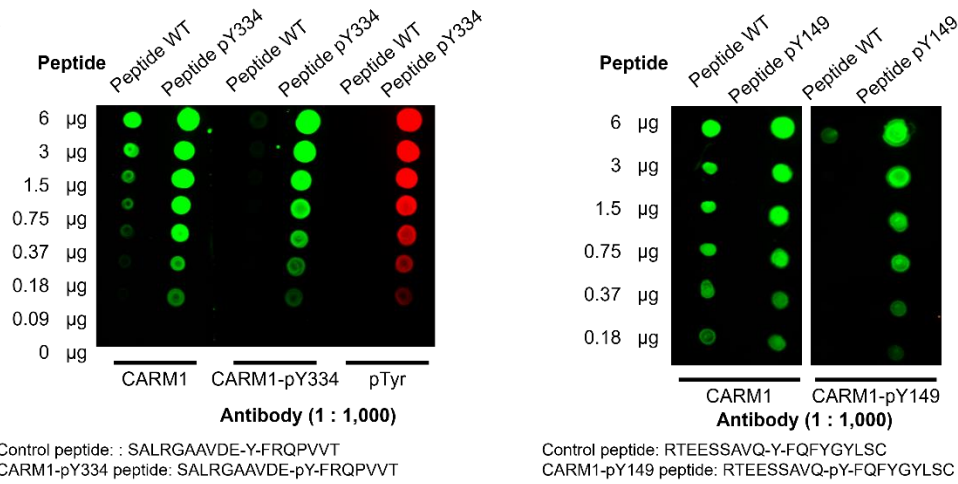

**B**

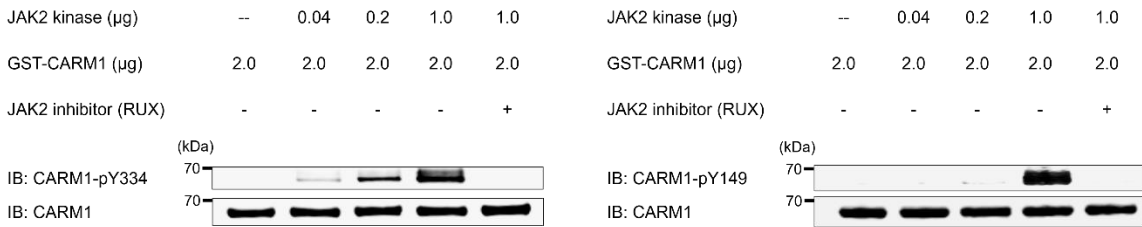

**C**

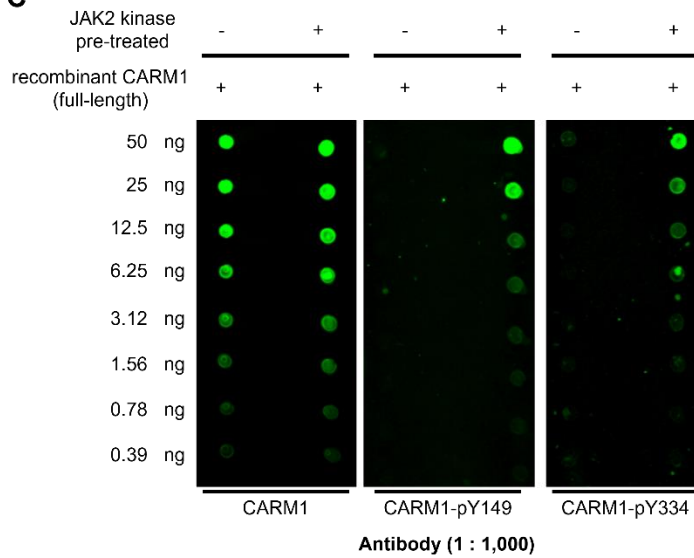

**D**

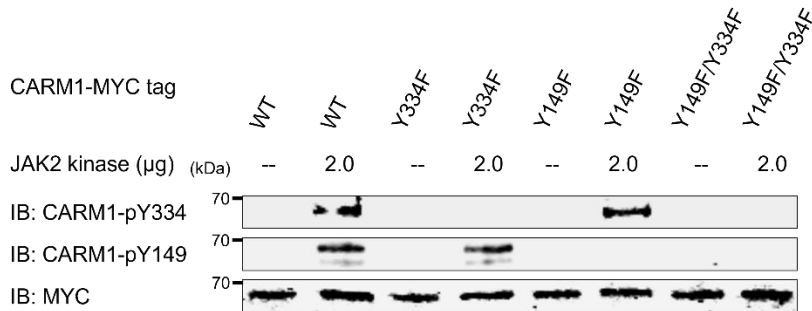

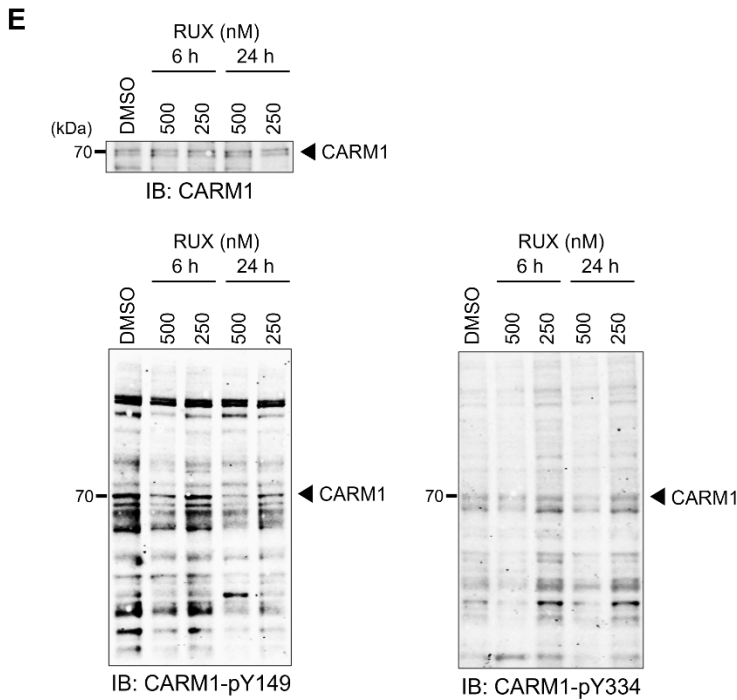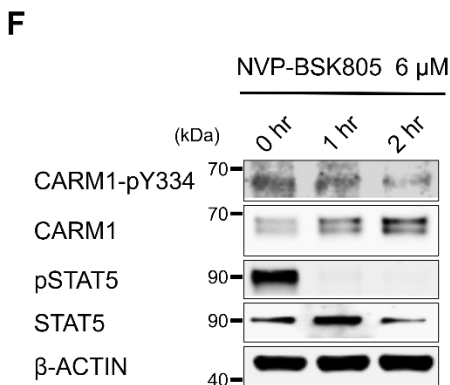

### Supplementary Figure 2. Anti-CARM1 phosphospecific antibodies recognize phosphorylated CARM1

(A) Dot-blot analysis showed that anti-CARM1-Y334 (left) and -Y149 (right) phosphospecific antibodies recognized phosphorylated peptides in a dose-dependent manner.

(B) Anti-CARM1-Y334 phosphospecific antibody recognized CARM1 in the presence of active JAK2 kinase in a dose-dependent manner (left). Anti-CARM1-Y149 phosphospecific antibody recognized CARM1 in the presence of active JAK2 kinase in a dose-dependent manner (right). In both assays, the complete abolishment of CARM1 phosphorylation by JAK1/JAK2 inhibitor (ruxolitinib, RUX; 500 nM) was observed.

(C) Dot-blot analysis showed that anti-CARM1-Y149 (middle) and -Y334 (right) phosphospecific antibodies recognized phosphorylated CARM1 proteins (full-length), generated by incubation with active JAK2 kinase.

(D) MYC-tagged CARM1 wild-type (WT), Y149F or Y334F single mutations, or Y149F/Y334F

double mutations were expressed in K562 cells. Proteins were precipitated by anti-MYC immunoprecipitation, and immunoblotted using anti-CARM1-phosphospecific antibodies following the incubation with or without recombinant active JAK2 kinase.

(E) Endogenous phosphorylated CARM1 was immunoblotted from total cell lysates of HEL cells treated with DMSO or RUX, using anti-CARM1-Y149 (left) and -Y334 (right) phosphospecific antibodies. The reduction of CARM1 phosphorylation was observed at the higher RUX concentration (500 nM).

(F) Phosphorylation of Y334 of CARM1 in HEL cells is reduced following treatment with the highly selective JAK2 inhibitor (NVP-BSK805, 6  $\mu$ M).

### Supplementary Figure 3.

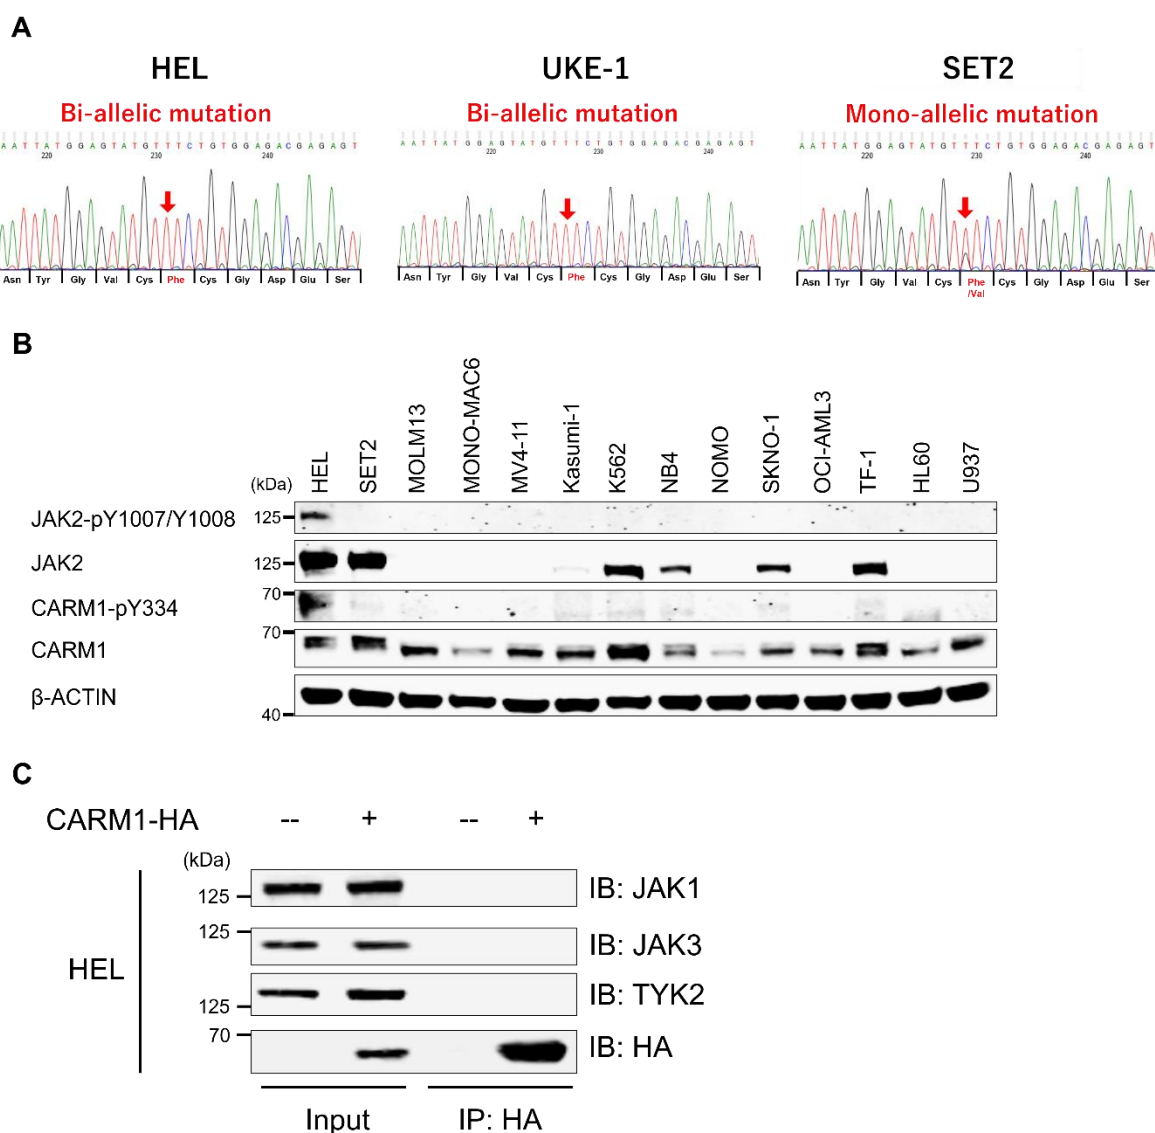

### Supplementary Figure 3. Mutational status of *JAK2-V617F* and *JAK2* auto-phosphorylation

(A) *JAK2-V617F* mutation was detected by direct sequencing after the amplification of genomic DNA by PCR as described previously [1]. Positions of the *JAK2-V617F* mutation are indicated by arrows. HEL and UKE-1 cells have bi-allelic mutations (homozygous), while SET2 cells has a mono-allelic mutation (heterozygous) at the genomic DNA level.

(B) The phosphorylation status of *JAK2* and *CARM1* is shown in 14 myeloid leukemia cell lines. HEL cells showed the highest level of *JAK2* auto-phosphorylation.

(C) Immunoprecipitation was performed using HEL cells that express HA-tagged *CARM1*, with an anti-HA antibody. Immunoblotting with anti-HA and anti-*JAK1*, *JAK2*, and *TYK2* antibodies did not identify any binding of *CARM1* to *JAK1*, *JAK2*, and *TYK2*.

## Supplementary Figure 4.

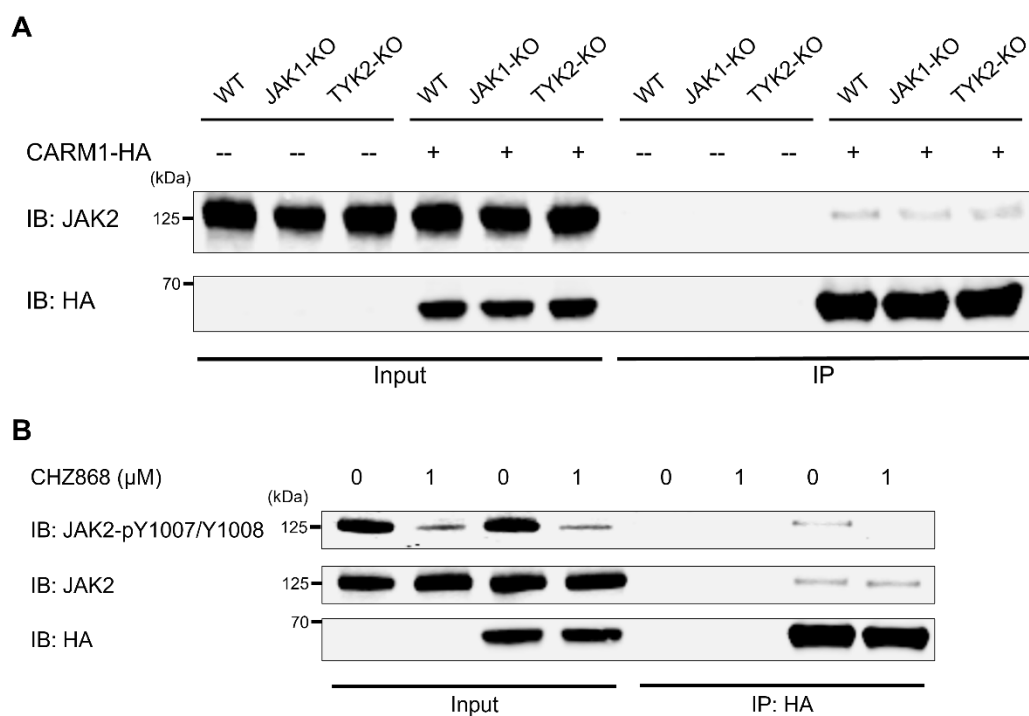

### Supplementary Figure 4. The effect of transphosphorylation of JAK2 by JAK1 or TYK2 on the binding between JAK2 and CARM1

(A) Immunoprecipitation was performed using clustered regularly interspaced short palindromic repeat (CRISPR)/CRISPR-associated protein-9 (Cas9) mediated JAK1 or TYK2 knockout HEL cells that express HA-tagged CARM1, with an anti-HA antibody. Immunoblotting with anti-HA and anti-JAK2 antibodies revealed the interaction between JAK2 and CARM1. Knockout of JAK1 or TYK2 did not alter the binding between CARM1 and JAK2.

(B) Immunoprecipitation was performed with an anti-HA antibody using HEL cells expressing HA-tagged CARM1 which were treated with type II JAK2 inhibitor (CHZ868) for 24 hours. Immunoblotting with anti-HA and anti-JAK2 antibodies revealed the interaction between JAK2 and CARM1. The binding between CARM1 and JAK2 was observed after reduction of JAK2 auto-phosphorylation.



## Supplementary Figure 5.

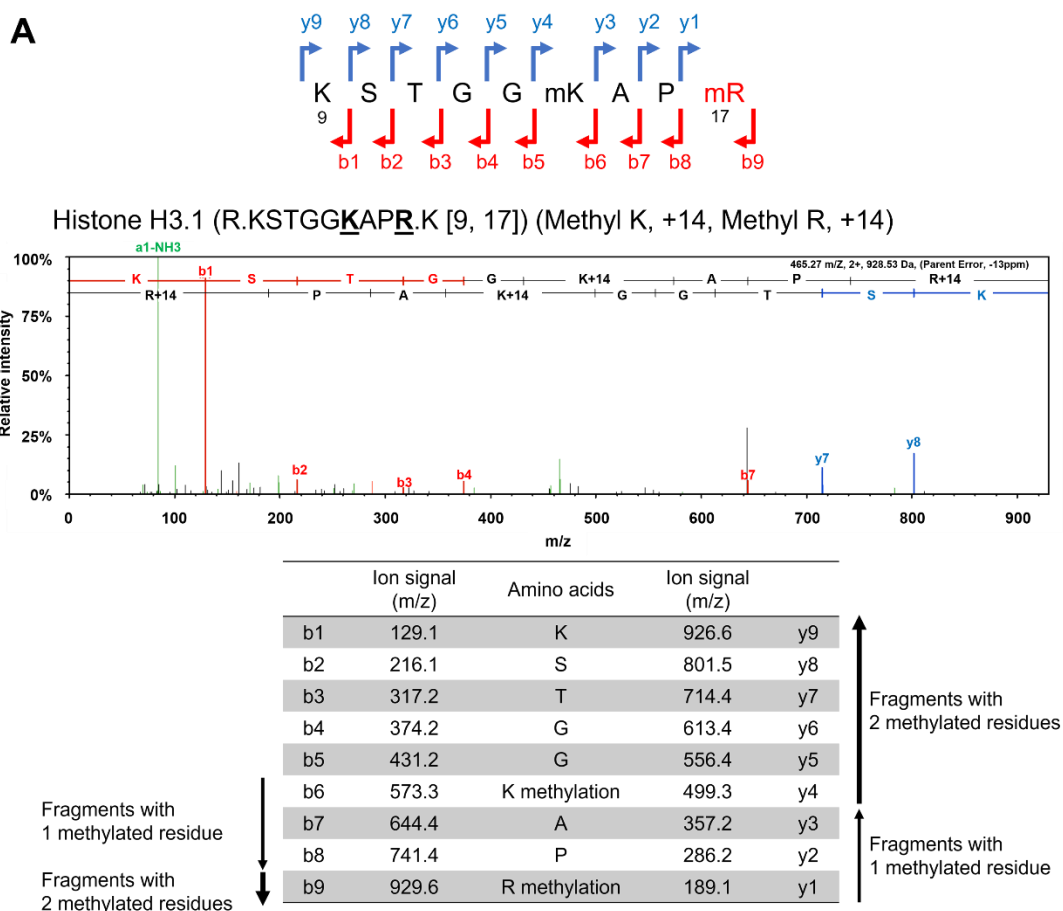

## B

|                               | Relative methylation intensity of Histone H3.1 (KSTGGKAPR) |
|-------------------------------|------------------------------------------------------------|
| With non-phosphorylated CARM1 | $3.66 \times 10^6$                                         |
| With phosphorylated CARM1     | $1.58 \times 10^7$                                         |

### Supplementary Figure 5. Mass spectrometry for the substrates of CARM1 after *in vitro* methylation assay

(A) Recombinant CARM1 was incubated with or without active JAK2 kinase in an *in vitro* assay, then phosphorylated CARM1 or non-phosphorylated CARM1 were subsequently incubated with histone 3.1. These substrates were subjected to LC-MS/MS analysis. Histone 3.1 peptides containing methylated R17 were identified in the incubation with phosphorylated CARM1 and non-phosphorylated CARM1.

(B) The number of histone H3.1 molecules with methylated residues was increased following incubation with phosphorylated CARM1 compared to non-phosphorylated CARM1.

**Supplementary Figure 6.**

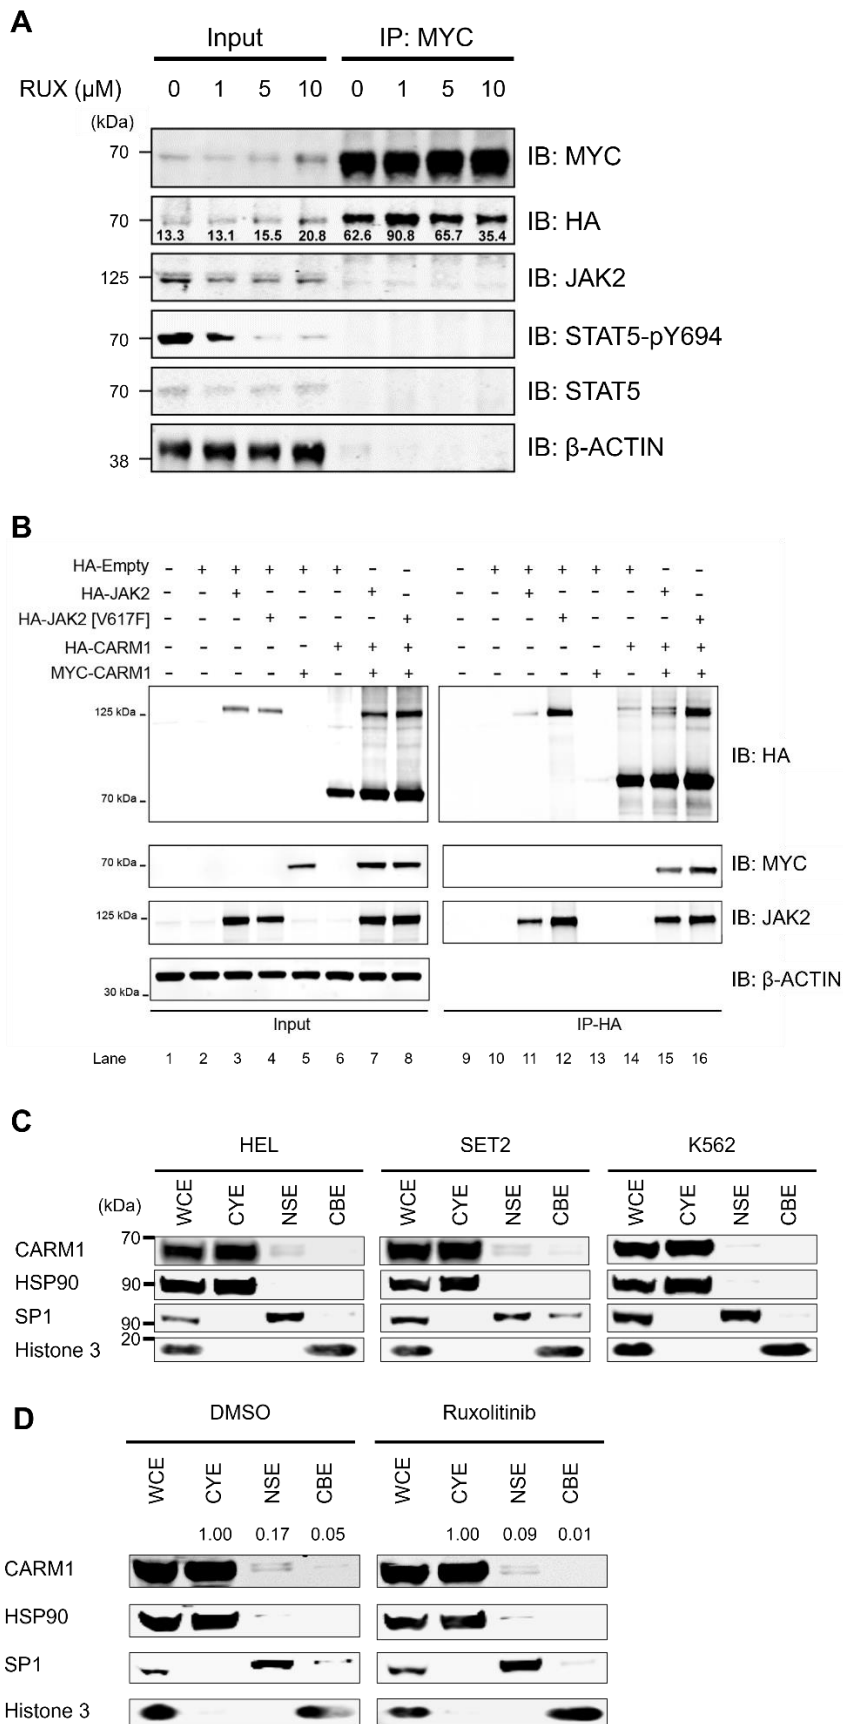

### **Supplementary Figure 6. Dimerization and subcellular localization of CARM1**

(A) HA-tagged WT-CARM1 and MYC-tagged WT-CARM1 constructs were co-transfected into 293T cells. Following immunoprecipitation with anti-MYC antibody, the detectable HA-tagged WT-CARM1 was decreased in the 293T cells treated with RUX 10  $\mu$ M vs. those treated with DMSO (RUX 0  $\mu$ M).

(B) HA-tagged WT-CARM1 and MYC-tagged WT-CARM1 constructs were co-transfected into 293T cells overexpressing HA-tagged WT-JAK2 or JAK2-V617F mutants. Following immunoprecipitation with anti-HA antibody, the detectable MYC-tagged WT-CARM1 was increased in the 293T cells expressing JAK2-V617F (lane 16) vs. those expressing WT-JAK2 (lane 15).

(C) The immunoblotting assay of subcellular localizations in HEL, SET2, and K562 cells revealed that total CARM1 is localized mainly in the cytoplasm. Purity of the subcellular fractions was assessed by detecting HSP90 (cytoplasmic extraction, CYE), SP1 (nuclear soluble extraction, NSE), and histone H3 (chromatin-bound extract, CBE). WCE indicates proteins within the whole-cell lysates.

(D) Immunoblotting to assess CARM1 subcellular localization in HEL cells treated with DMSO or ruxolitinib (RUX) (500 nM).

**Supplementary Figure 7.**

**A**

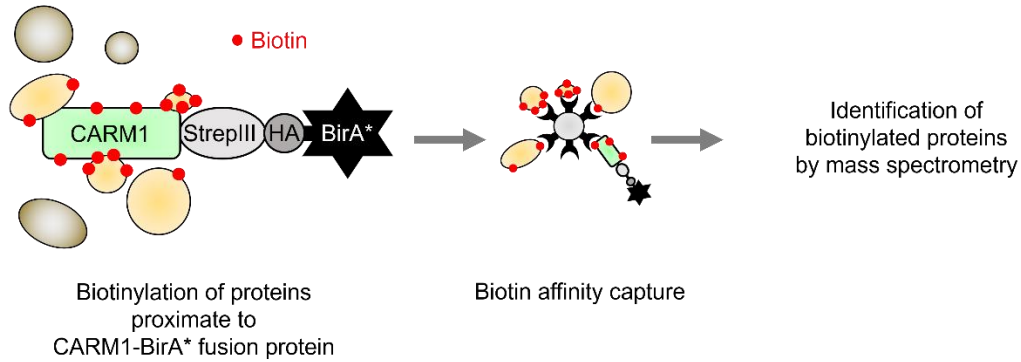

**B**

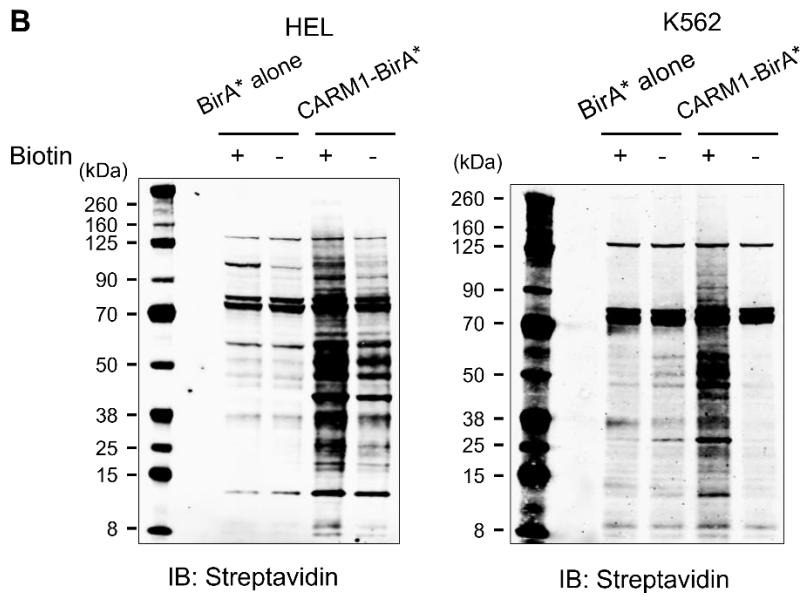

**C**

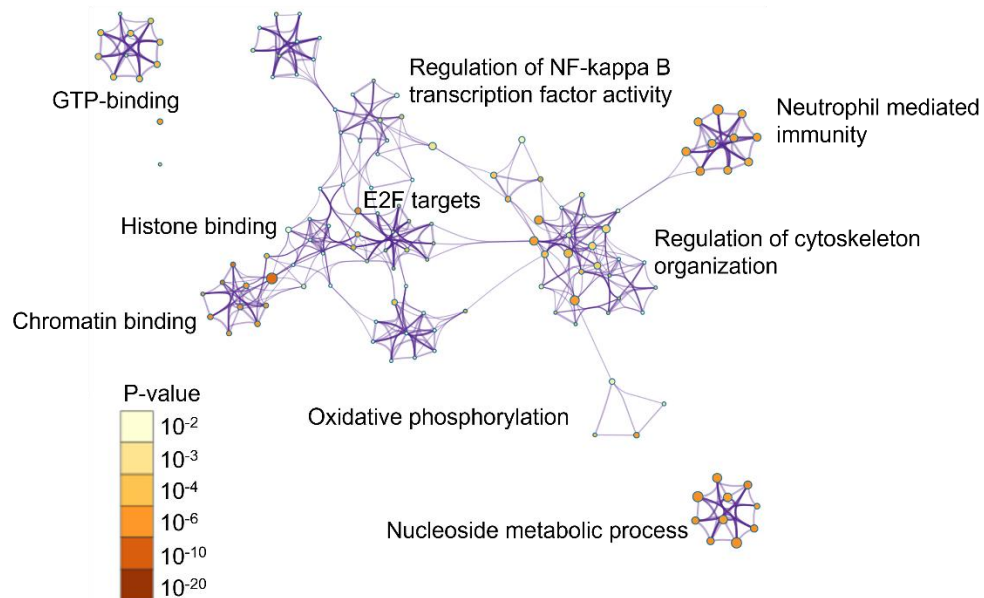

D

HEL

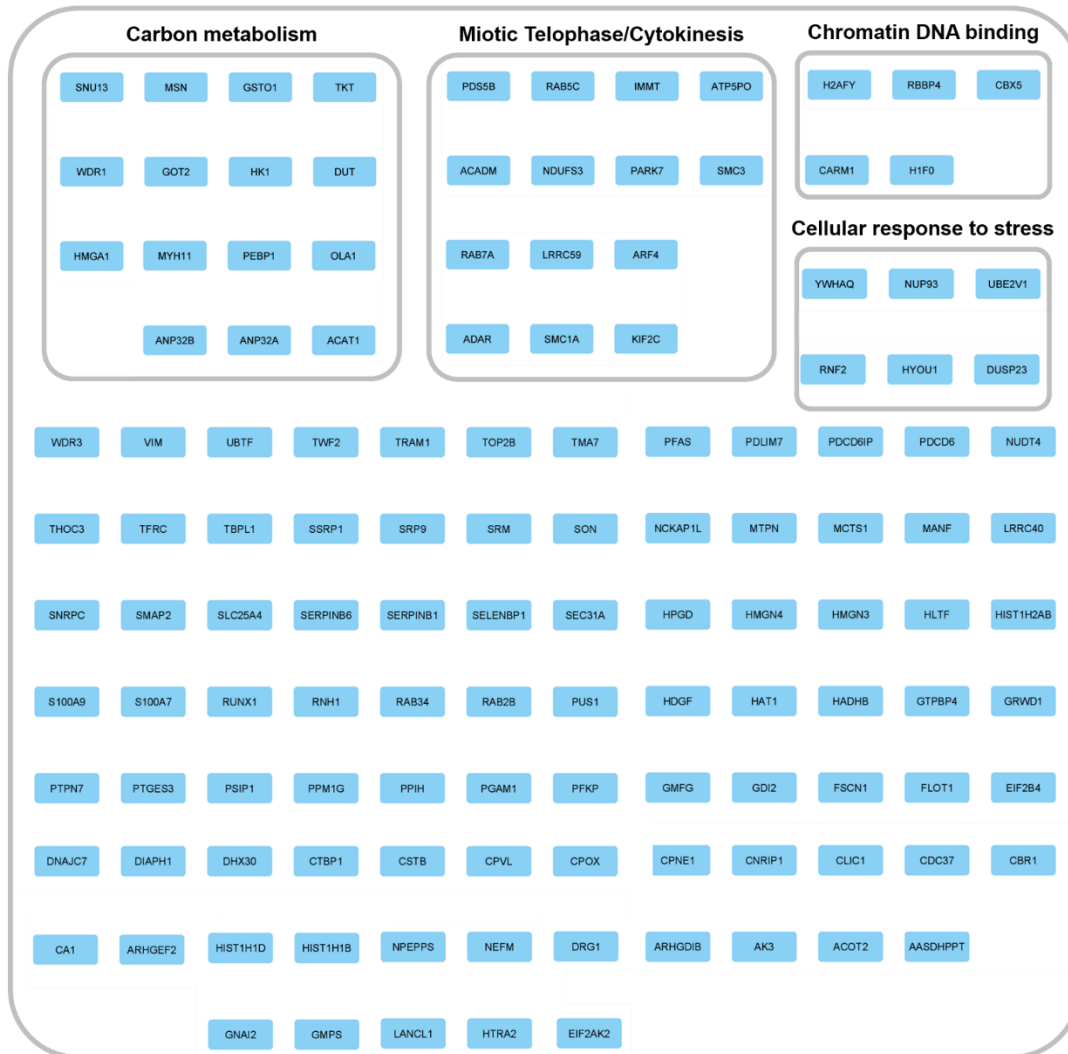

K562

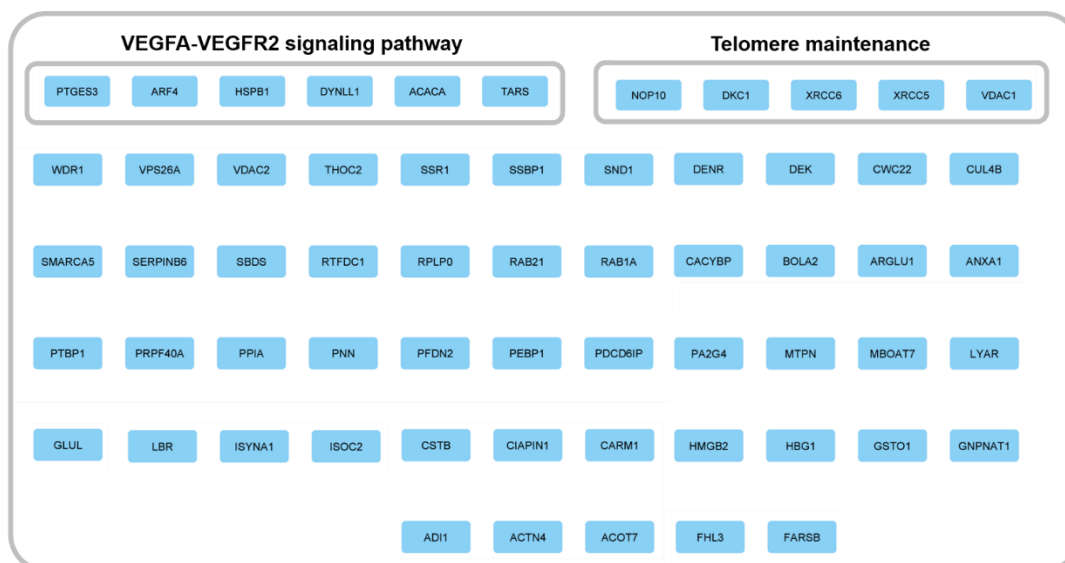

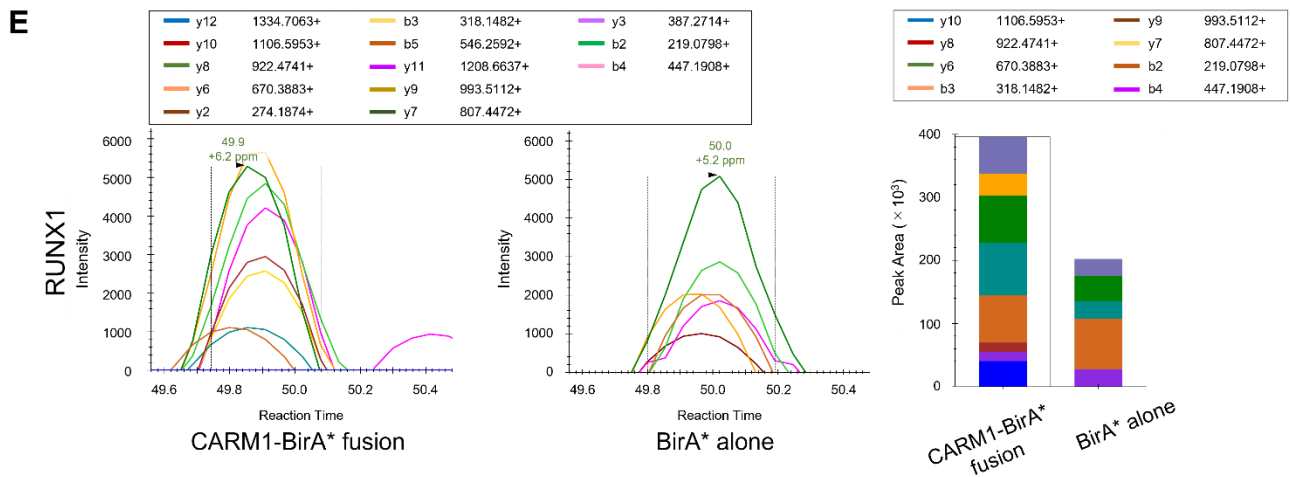

### Supplementary Figure 7. The interactome of CARM1 by BioID system

- (A) Schematic diagram demonstrating BioID (proximity-dependent biotin identification) approach for the identification of CARM1-interacting proteins.
- (B) Western blots confirming biotinylated proteins of lysate from HEL cells with CARM1-BirA\* fusion proteins overexpression in culture medium with or without biotin.
- (C) Metascape enrichment network visualization showing the intra-cluster and inter-cluster similarities of enrichment terms, up to nine terms per clusters, in HEL cells. Terms are defined according to GO/KEGG terms, canonical pathways, and hallmark gene sets. The connecting pairs of nodes are created with Kappa score >0.3. Terms containing more genes tend to have a more significant *P*-value; the darker color of the node indicates the more statistically significant *P*-value. CARM1-associated proteins clustered into groups of proteins identified as being involved in purine nucleotide metabolism, E2F targets, MYC targets, histone and chromatin binding proteins, and ribonucleoprotein complex biogenesis, based on enriched pathway analysis of Metascape (metascape.org) for both cell lines.
- (D) Proteins binding to CARM1 and enrichment network visualization for the results in HEL and K562 cells. See also supplementary data. As JAK2 are weakly and transiently associated with its substrates, we did not observe the interaction of CARM1 with JAK2 in HEL cells.
- (E) Targeted mass spectrometry analysis using parallel reaction monitoring revealed the interaction of CARM1 with RUNX1 in HEL cells. Skyline chromatogram visualizations showed the intensity at each resampled retention time point for all fragment ions, which were presented as different colored lines identified in the legends. Peak areas by each fragment were displayed as the bar graphs (left) to compare the intensity of samples from HEL cells with CARM1-BirA\* fusion (total AUC value, 395,628) to those with BirA\* alone (total AUC value, 215,928).

**Supplementary Figure 8.**

**A**

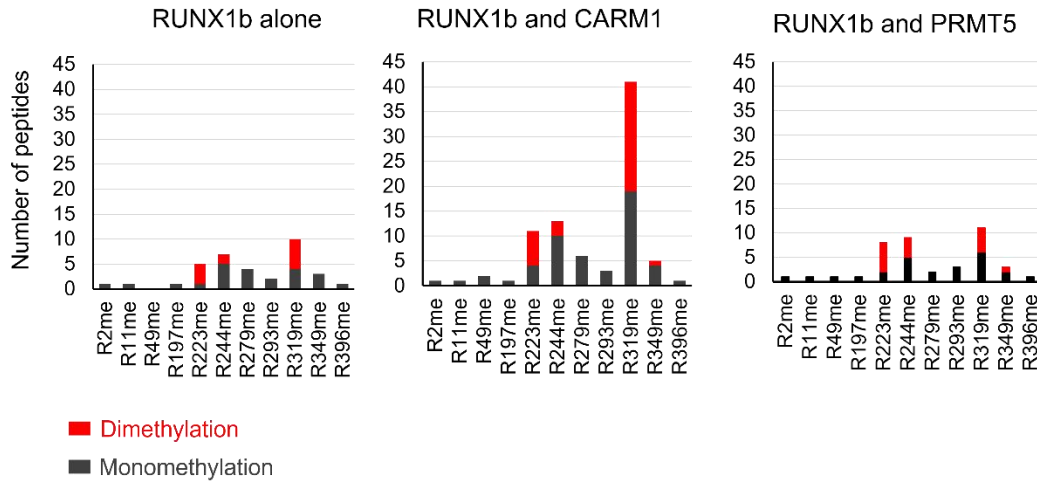

**B**

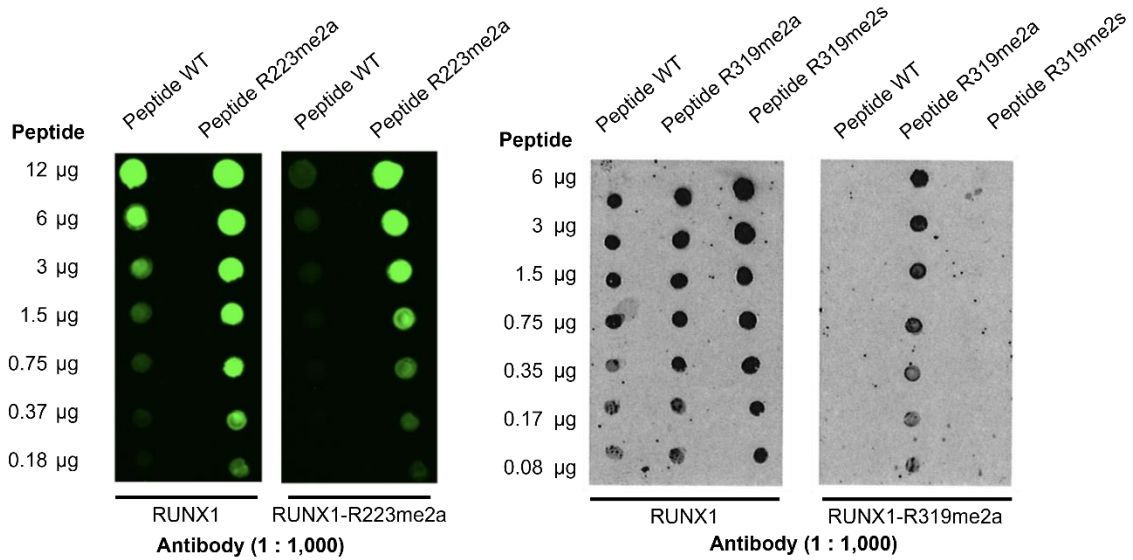

Control peptide: APTPNPR-R-ASLNHS  
 RUNX1-R223me2a peptide: APTPNPR-Rme2a-ASLNHS

Control peptide: DPRQFPALPSISDP-R-MHYPGAFTYSPTPVC  
 RUNX1-R319me2a peptide: DPRQFPALPSISDP-Rme2a-MHYPGAFTYSPTPVC  
 RUNX1-R319me2s peptide: DPRQFPALPSISDP-Rme2s-MHYPGAFTYSPTPVC

**C**

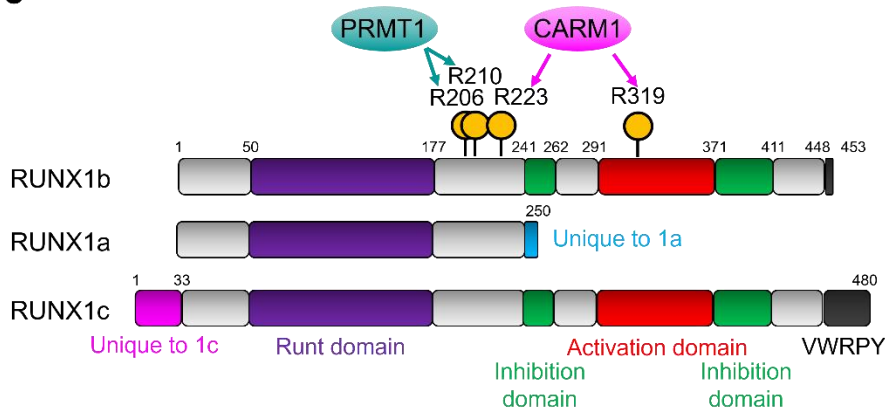

D

**223**

|                     |   |   |   |   |   |   |   |   |   |   |   |   |   |   |   |   |   |   |   |   |   |   |   |   |   |   |   |   |   |   |   |   |   |
|---------------------|---|---|---|---|---|---|---|---|---|---|---|---|---|---|---|---|---|---|---|---|---|---|---|---|---|---|---|---|---|---|---|---|---|
| Human               | A | M | R | V | S | P | H | H | P | A | P | T | P | N | P | R | A | S | L | N | H | S | T | A | F | N | P | Q | P | Q | S | Q | M |
| Chimpanzee          | A | M | R | V | S | P | H | H | P | A | P | T | P | N | P | R | A | S | L | N | H | S | T | A | F | N | P | Q | P | Q | S | Q | M |
| Rhesus macaque      | A | M | R | V | S | P | H | H | P | A | P | T | P | N | P | R | A | S | L | N | H | S | T | A | F | N | P | Q | P | Q | S | Q | M |
| Pig                 | A | M | R | V | S | P | H | H | P | A | P | T | P | N | P | R | A | S | L | N | H | S | T | A | F | N | P | Q | P | Q | S | Q | M |
| Dog                 | A | M | R | V | S | P | H | H | P | A | P | T | P | N | P | R | A | S | L | N | H | S | T | A | F | N | P | Q | P | Q | S | Q | M |
| Bovine              | A | M | R | V | S | P | H | H | P | A | P | T | P | N | P | R | A | S | L | N | H | S | T | A | F | N | P | Q | P | Q | S | Q | M |
| Horse               | A | M | R | V | S | P | H | H | P | A | P | T | P | N | P | R | A | S | L | N | H | S | T | A | F | N | P | Q | P | Q | S | Q | M |
| Rat                 | A | M | R | V | S | P | H | H | P | A | P | T | P | N | P | R | A | S | L | N | H | S | T | A | F | N | P | Q | P | Q | S | Q | M |
| Mouse               | A | M | R | V | S | P | H | H | P | A | P | T | P | N | P | R | A | S | L | N | H | S | T | A | F | N | P | Q | P | Q | S | Q | M |
| Chicken             | A | M | R | V | S | P | H | H | P | A | P | T | P | N | P | R | A | S | L | N | H | S | T | A | F | N | P | Q | P | Q | S | Q | M |
| African clawed frog | A | M | R | C | S | P | H | H | P | N | P | M | P | N | P | R | A | T | L | N | H | S | A | A | F | N | P | Q | P | Q | G | Q | I |

E

**319**

|                     |   |   |   |   |   |   |   |   |   |   |   |   |   |   |   |   |   |   |   |   |   |   |   |   |   |   |   |   |   |   |   |   |   |
|---------------------|---|---|---|---|---|---|---|---|---|---|---|---|---|---|---|---|---|---|---|---|---|---|---|---|---|---|---|---|---|---|---|---|---|
| Human               | R | - | - | - | - | Q | F | P | A | L | P | S | I | S | D | P | R | M | H | Y | P | G | A | F | T | Y | S | P | T | P | V | T |   |
| Chimpanzee          | R | - | - | - | - | Q | F | P | A | L | P | S | I | S | D | P | R | M | H | Y | P | G | A | F | T | Y | S | P | T | P | V | T |   |
| Rhesus macaque      | R | - | - | - | - | Q | F | P | A | L | P | S | I | S | D | P | R | M | H | Y | P | G | A | F | T | Y | S | P | T | P | V | T |   |
| Pig                 | R | - | - | - | - | Q | F | P | A | L | P | S | I | S | D | P | R | M | H | Y | P | G | A | F | T | Y | S | P | T | P | V | T |   |
| Dog                 | R | - | - | - | - | Q | F | P | A | L | P | S | I | S | D | P | R | M | H | Y | P | G | A | F | T | Y | S | P | T | P | V | T |   |
| Bovine              | R | - | - | - | - | Q | F | P | A | L | P | S | I | S | D | P | R | M | H | Y | P | G | A | F | T | Y | S | P | T | P | V | T |   |
| Horse               | R | - | - | - | - | Q | F | P | A | L | P | S | I | S | D | P | R | M | H | Y | P | G | A | F | T | Y | S | P | T | P | V | T |   |
| Rat                 | R | - | - | - | - | Q | F | P | T | L | P | S | I | S | D | P | R | M | H | Y | P | G | A | F | T | Y | S | P | - | P | V | T |   |
| Mouse               | R | - | - | - | - | Q | F | P | T | L | P | S | I | S | D | P | R | M | H | Y | P | G | A | F | T | Y | S | P | - | P | V | T |   |
| Chicken             | R | V | G | I | D | R | S | F | S | A | L | P | S | I | S | D | P | R | M | H | Y | P | G | A | F | T | Y | T | P | T | P | V | S |
| African clawed frog | R | V | G | I | D | R | Q | F | S | T | L | P | S | I | S | D | P | R | M | H | Y | P | G | A | F | T | Y | T | P | T | P | V | T |

**Supplementary Figure 8. Asymmetric dimethylation of R223 and R319 in RUNX1b**

(A) Recombinant RUNX1b (full-length) was generated from baculovirus-infected Sf9 cells. Recombinant RUNX1b was incubated with CARM1 or PRMT5 in an *in vitro* methylation assay, and RUNX1b peptides were subjected to LC-MS/MS analysis. The RUNX1b peptides containing methylated arginine-223 (R223) and arginine-319 (R319) were twice as represented in the incubation of RUNX1b and CARM1 than the RUNX1b alone (baseline). The asymmetric dimethylation levels of R223 and R319 on RUNX1b were comparable between RUNX1b only and incubation of RUNX1b with PRMT5.

(B) The dot-plot analysis showed that anti-RUNX1-R223 (left) or -R319 (right) methylation specific antibodies recognized methylated peptides in a dose-dependent manner.

(C) Schematic diagram of RUNX1b, showing the positions of R223 and R319; the numbers correspond to the amino acid positions.

(D) Sequence alignment around R223 of RUNX1b.

(E) Sequence alignment around R319 of RUNX1b. The alignments of R223 and R319 in RUNX1b showed are evolutionally conserved in mammals.



## Supplementary Figure 9.

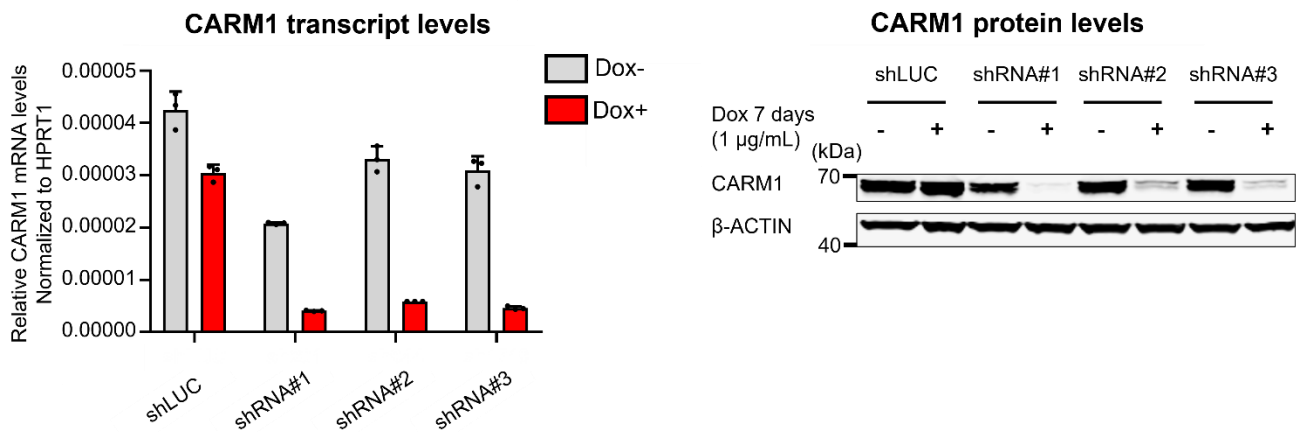

### Supplementary Figure 9. Doxycycline-inducible shRNAs knockdown CARM1 in HEL cells

Doxycycline-inducible short hairpin RNAs (shRNAs) against CARM1 were stably expressed in HEL cells. CARM1 transcripts (left, n=3) and protein (right) were significantly reduced following 7 days of doxycycline exposure. All error bars represent the mean  $\pm$  SD. All error bars represent the mean  $\pm$  SD.

## Supplementary Figure 10.

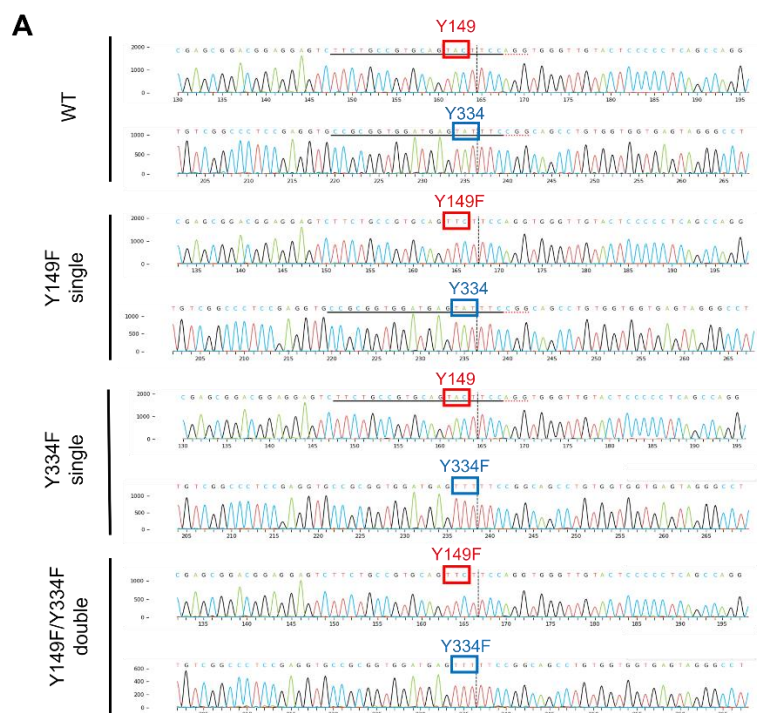

**B** CRISPR/Cas9-mediated knock-in CARM1 mutant

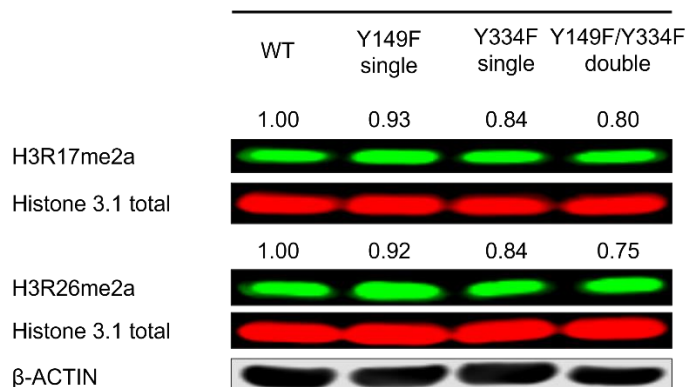

### Supplementary Figure 10. Confirmation of non-phosphorylatable CARM1 mutation knock-in HEL cells

(A) Monoclonal populations of CRISPR/Cas9 mediated CARM1-Y149F or -Y334F single, or -Y149F/Y334F double mutant knock-in cells were generated after single cell expansion. Homozygous single mutations (Y149F or Y334F) or double mutations (Y149F/Y334F) were confirmed by direct sequencing after the amplification of genomic DNA.

(B) Clustered regularly interspaced short palindromic repeat (CRISPR)/CRISPR-associated protein-9 (Cas9)-mediated non-phosphorylatable CARM1 mutant knock-in modestly decreased the levels of ADMA histone H3R17 and H3R26.

### Supplementary Figure 11.

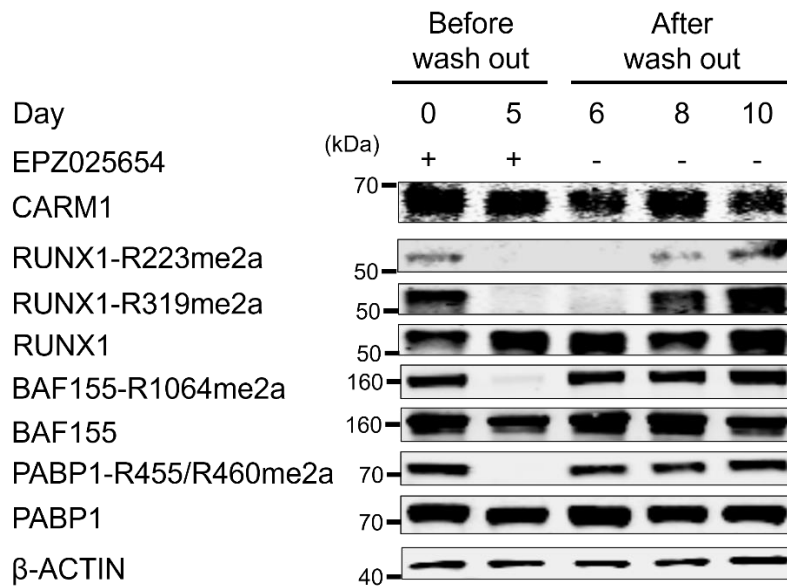

### Supplementary Figure 11. The reversibility of ADMA in multiple CARM1 substrates

The asymmetrically dimethylated arginine levels of RUNX1, BAF155, and PABP1, were defined following EPZ025654 treatment for 5 days and a variable period of wash-out.

Supplementary Figure 12.

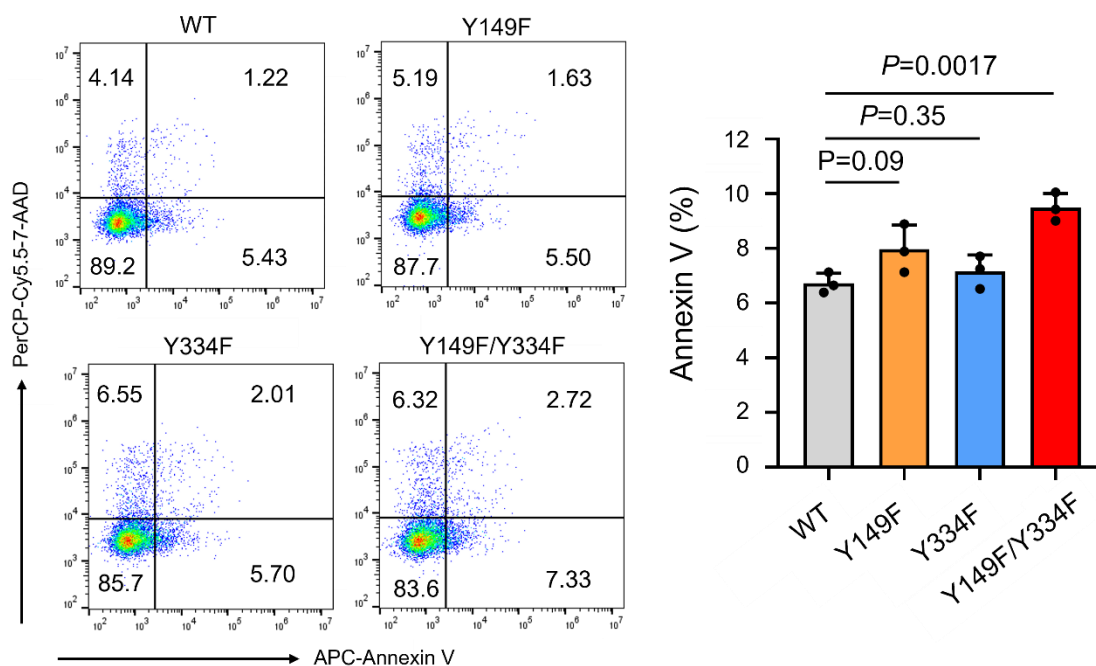

**Supplementary Figure 12. Comparison of the effects of non-phosphorylatable CARM1 mutation on Annexin V/7-ADD positivity in HEL cells**

Flow cytometric analysis of various CARM1 mutant HEL cells to detect annexin V positive cells (left panel). Fractions of the annexin V-positive populations are plotted (right panel) as mean  $\pm$  s.d.  $n=3$ . All error bars represent the mean  $\pm$  SD.  $P$  values were determined by two-tailed Student's  $t$ -test.

## Supplementary Figure 13.

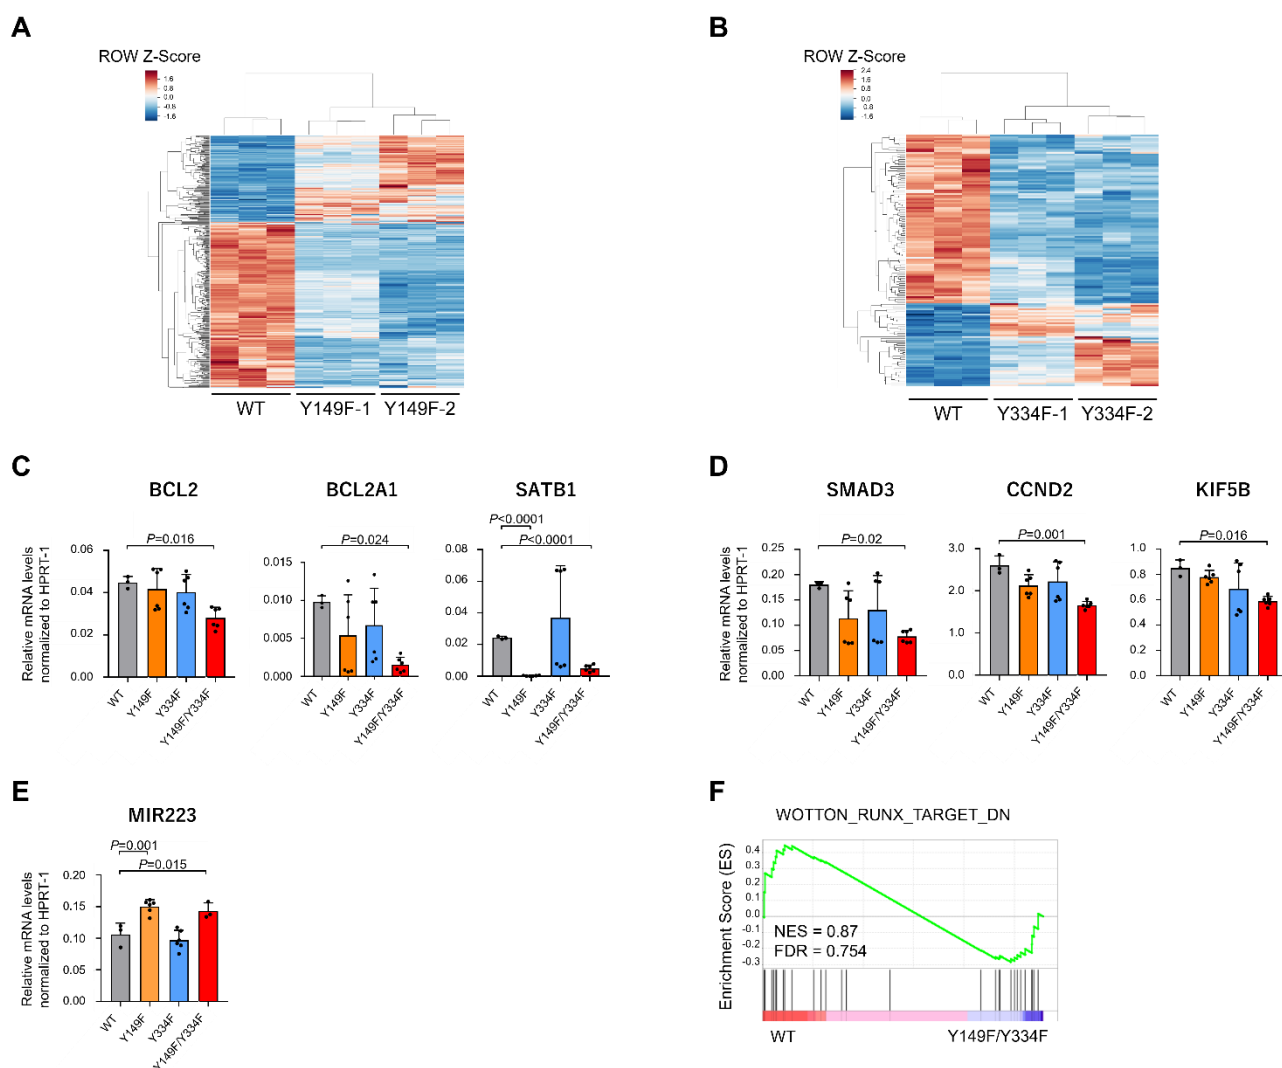

### Supplementary Figure 13. Gene expression in non-phosphorylatable CARM1 mutation knock-in HEL cells

(A) Heatmap of the expression of 401 differentially expressed genes, representing replicates of cells expressing CARM1-WT or two independent cells expressing CARM1-Y149F single mutation (Y149F-1 and Y149F-2).

(B) Heatmap of the expression of 144 differentially expressed genes, representing replicates of cells expressing CARM1-WT or two independent cells expressing CARM1-Y334F single mutation (Y334F-1 and Y334F-2).

(C) qRT-PCR analysis showing expression genes associated with anti-apoptosis (*BCL2*, *BCL2A1*, and *SATB1*). Mean and SD are expressed as a percentage of *HPRT-1* expression, at least two biological replicates. CARM1 WT (n=3), Y149F (n=6), Y334F (n=6), and Y149F/Y334F mutation (n=6).

(D) qRT-PCR analysis showing expression genes associated with G2/M checkpoint (*SMAD3*, *CCND2*, and *KIF5B*). Mean and SD are expressed as a percentage of *HPRT-1* expression at least two biological

replicates. CARM1 WT (n=3), Y149F (n=6), Y334F (n=6), and Y149F/Y334F mutation (n=6).

(E) qRT-PCR analysis showing the higher expression of MIR223 in CARM1-Y149F/Y334F double mutation than CARM1-WT. Mean and SD are expressed as a percentage of *HPRT-1* expression at least two biological replicates. CARM1 WT (n=3), Y149F (n=6), Y334F (n=6), and Y149F/Y334F mutation (n=3).

(C)(D)(E) All error bars represent the mean  $\pm$  SD. *P* values were determined by t one-way ANOVA followed by Dunnett's post hoc test.

(F) Representative GSEA plot depicting the regulation of "RUNX1-target" signature.

Supplementary Figure 14.

**A**

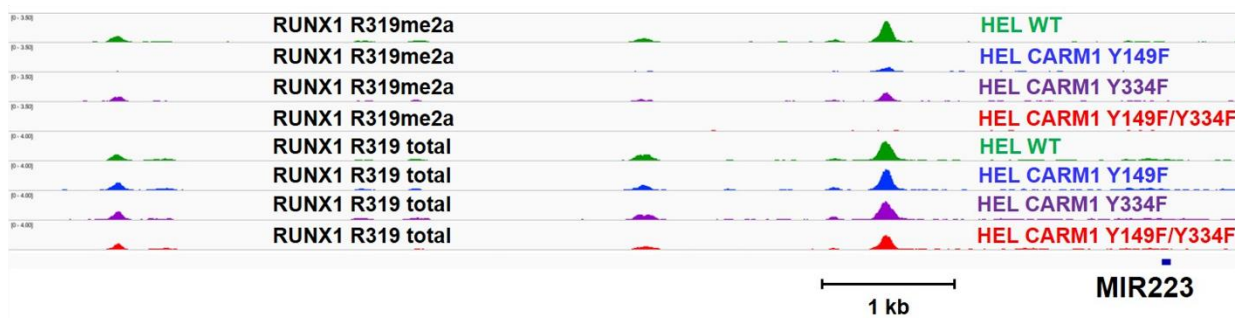

**B**

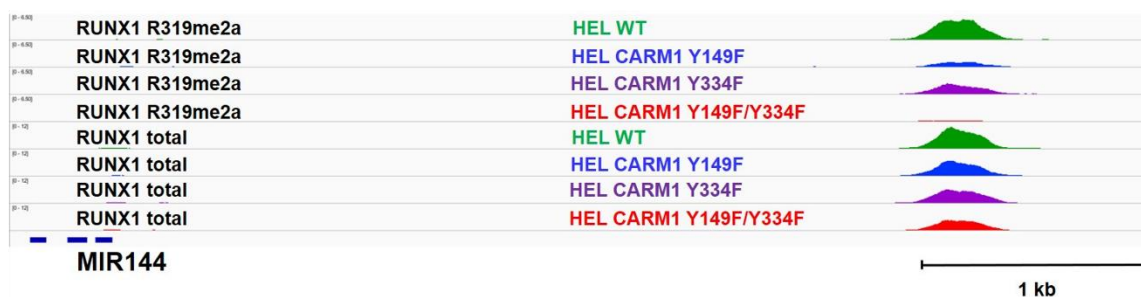

**Supplementary Figure 14. ChIP-seq analysis demonstrating changes in asymmetrically dimethylated R319-RUNX1 occupancies on RUNX1 targeted genes**

Target occupancies of RUNX1 and asymmetrically dimethylated R319-RUNX1 at *MIR144* (A) and *MIR223* genes (B) determined using antibody against total R319-RUNX1 and asymmetrically dimethylated R319-RUNX1, as shown in IGV genome browser tracks.

Supplementary Figure 15.

**A**

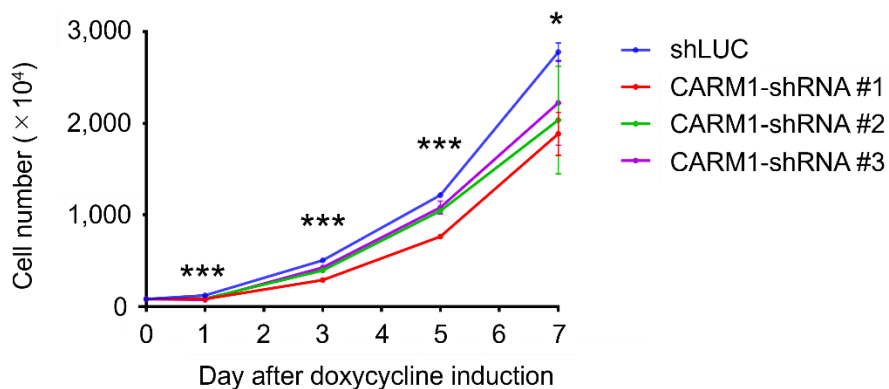

**B**

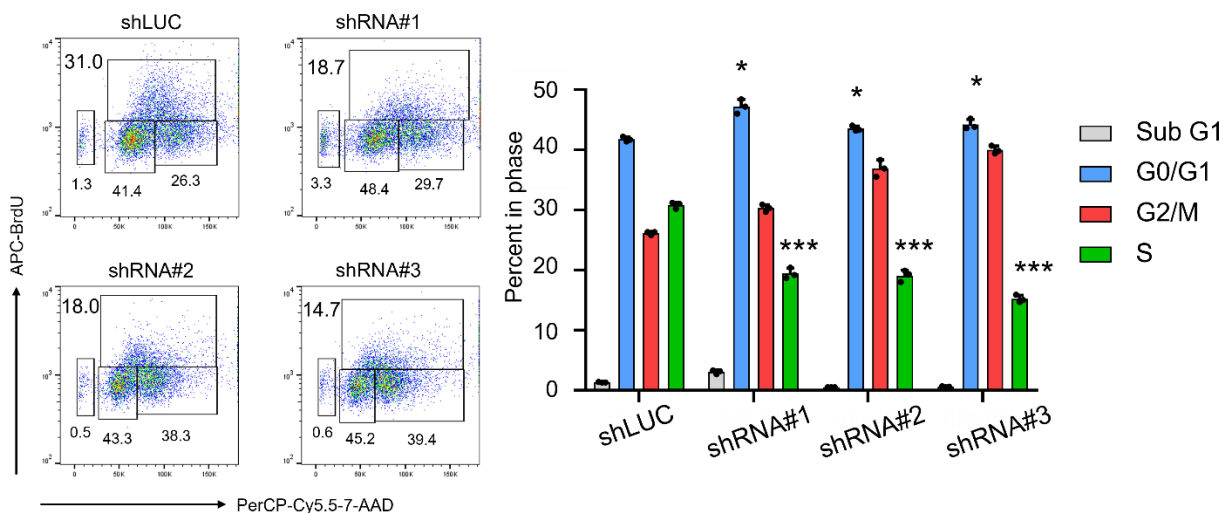

**C**

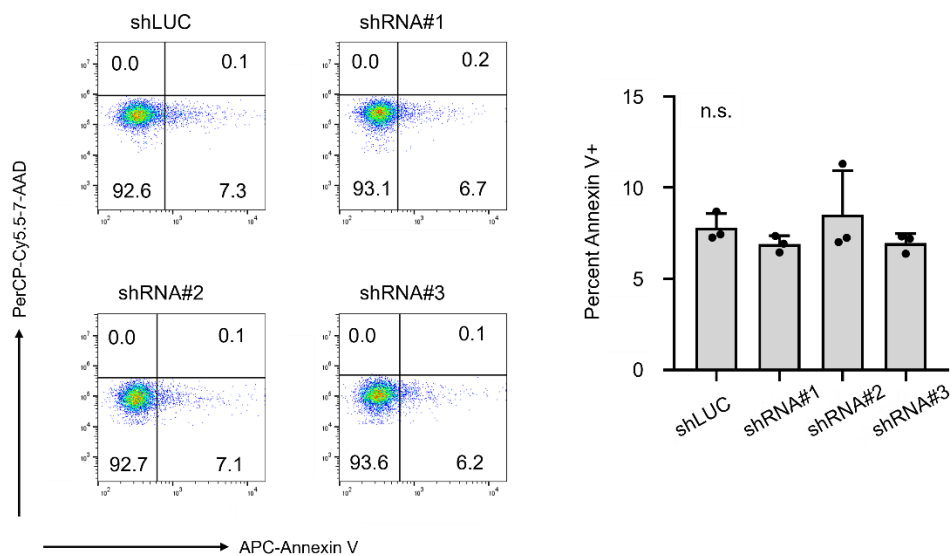



**Supplementary Figure 15. The biological impact of CARM1 knockdown in HEL cells**

(A) Cell counts from shRNA-mediated CARM1 knockdown (KD) HEL cells using three different shRNAs plus a control shRNA (shLUC). All error bars represent the mean  $\pm$  SD. *P* values were determined by one-way ANOVA test.  $n=5$ , \* $p<0.05$ , \*\*\* $P<0.001$ .

(B) Percentage of cells in sub-G1, G1, S or G2/M phase in HEL cells infected with a CARM1 KD lentivirus. All experiments were repeated three independent times. All error bars represent the mean  $\pm$  SD. *P* values were determined by two-tailed Student's *t*-test. G0/G1 ( $p=0.002$ ) and S populations ( $p<0.0001$ ) in shRNA#1 vs. shLUC; G0/G1 ( $p=0.007$ ) and S populations ( $p<0.0001$ ) in shRNA#3 vs. shLUC; G0/G1 ( $p=0.012$ ) and S populations ( $p<0.0001$ ) in shRNA#3 vs. shLUC. \* $p<0.05$ , \*\*\* $p<0.001$ .

(C) KD of CARM1 has minimal effect on apoptosis in HEL cells. The percentage of apoptotic cells in HEL cells stably expressing doxycycline-inducible shRNA against CARM1 are shown in bar graphs. All experiments were repeated three independent times. All error bars represent the mean  $\pm$  SD. *P* values were determined by two-tailed Student's *t*-test

# Supplementary Figure 16.

**A**

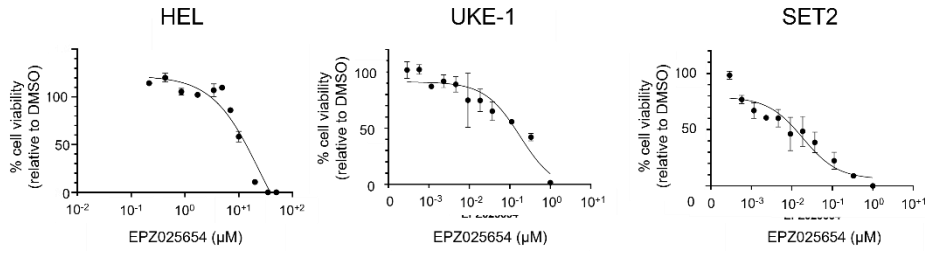

**B**

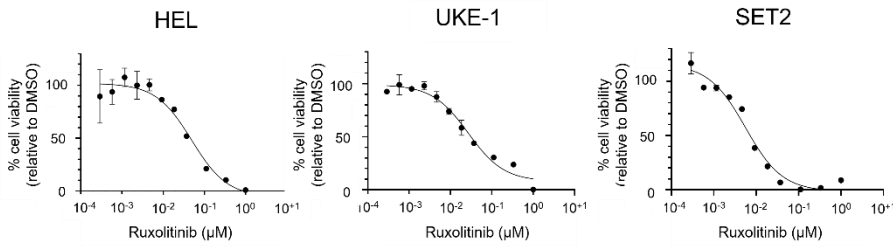

**C**

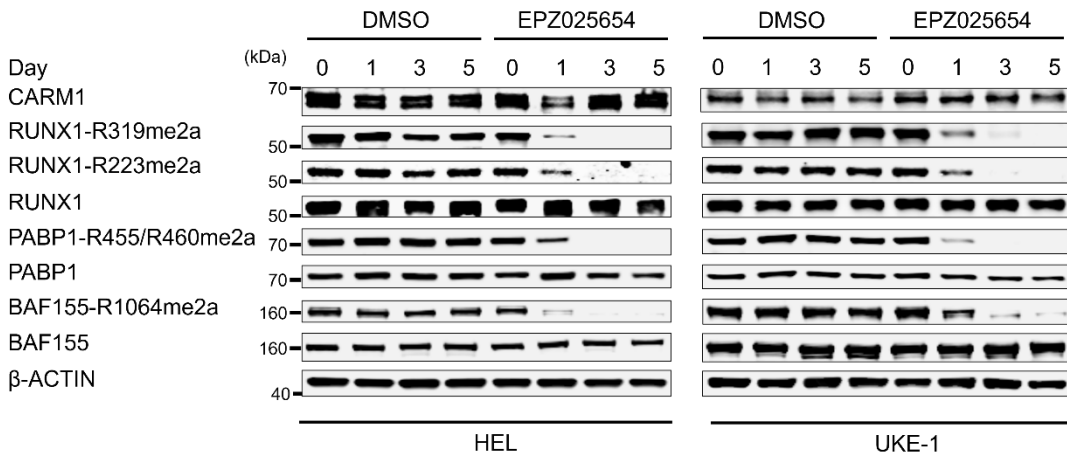

**D**

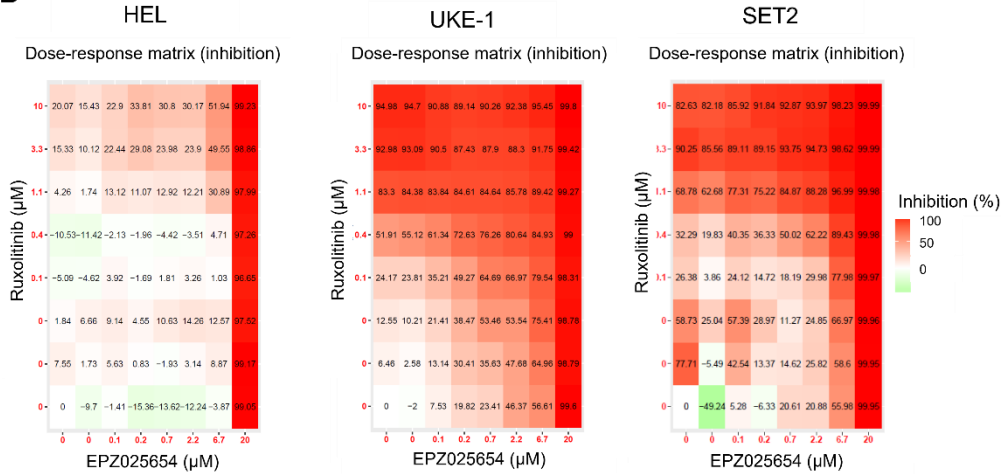

### **Supplementary Figure 16. Pharmacological inhibition of CARM1 and JAK2**

(A) Proliferation of HEL, UKE-1, and SET2 cells (harboring JAK2-V617F mutations) with increasing concentration of EPZ025654 ( $\mu\text{M}$ ) relative to DMSO. The half maximal inhibitory concentration ( $\text{IC}_{50}$ ) values for EPZ025654 are 23.7  $\mu\text{M}$ , 1.8  $\mu\text{M}$ , and 186.5 nM in HEL, UKE-1, and SET2 cells, respectively.

(B) Proliferation with increasing concentration of RUX ( $\mu\text{M}$ ) relative to DMSO is depicted for HEL, UKE-1, and SET2 cells.  $\text{IC}_{50}$  values for RUX are 492 nM, 269 nM, and 56 nM in HEL, UKE-1, and SET2 cells, respectively.

(C) HEL cells were treated with a CARM1 inhibitor (5  $\mu\text{M}$  EPZ025654) for 1, 3, and 5 days. The level of ADMA RUNX1, BAF155, and PABP1 was significantly decreased at day 1, and completely abolished at day 5.

(D) Visualization of the dose-response matrix and the plots of phenotypic cellular responses to EPZ025654, ruxolitinib, or the combination in HEL (left), UKE-1 (middle), and SET2 cells (right).

**Supplementary Figure 17. Uncropped scans from figure 1 and 2. The boxes indicate the cropped images.**

**Figure 1A**

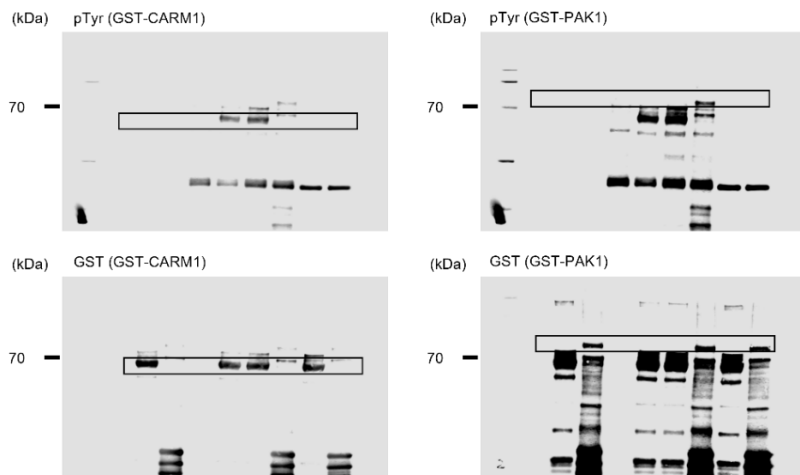

**Figure 2A**

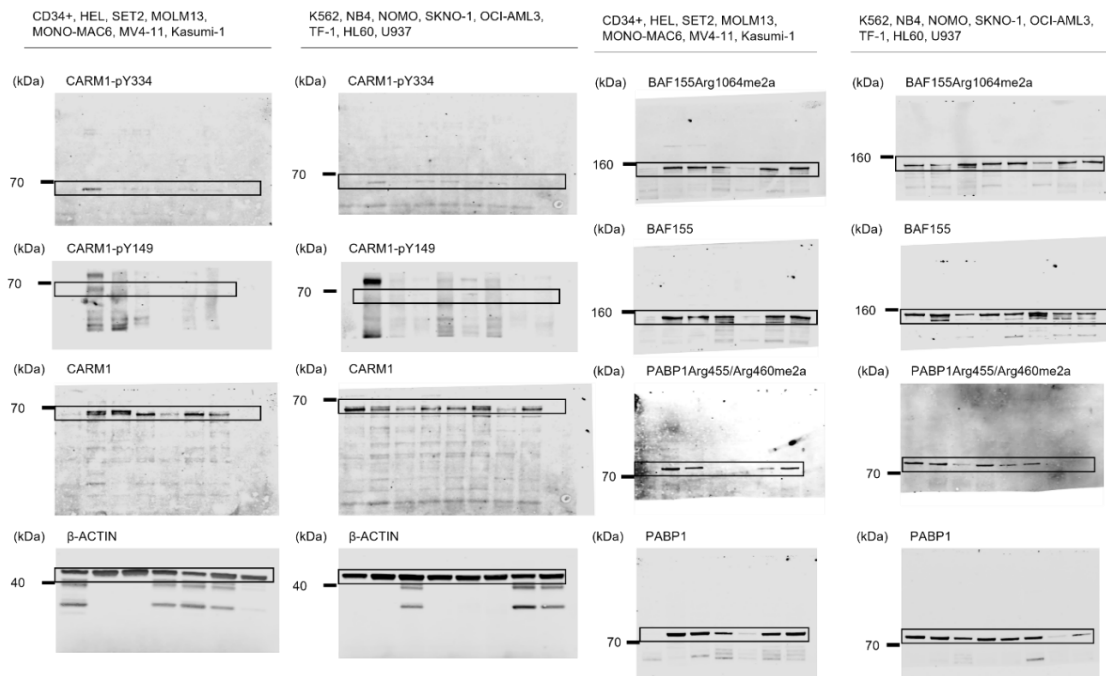

**Figure 2B**

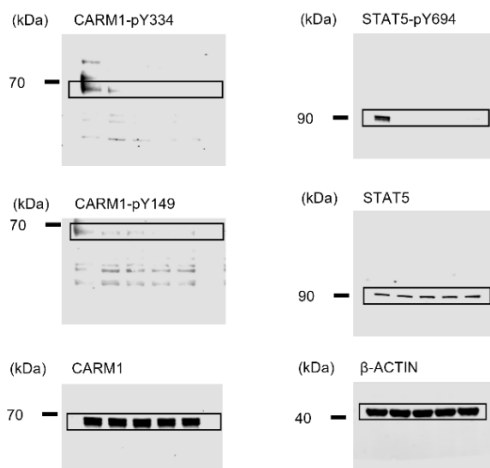

**Figure 2C**

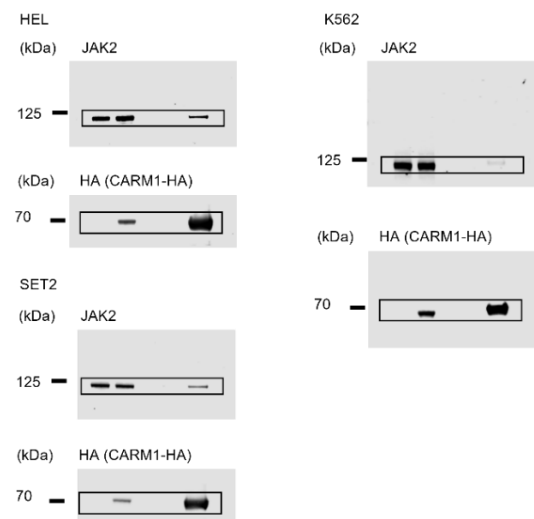

**Figure 2D**

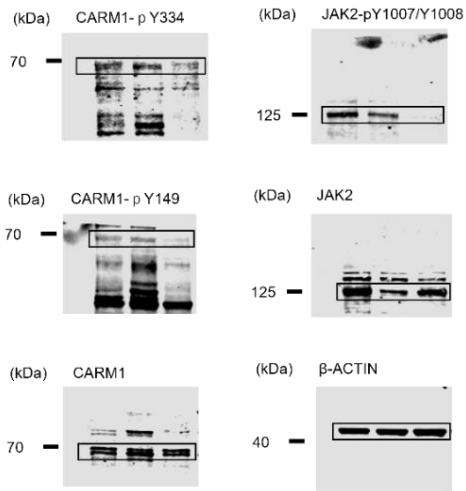

**Figure 2E**

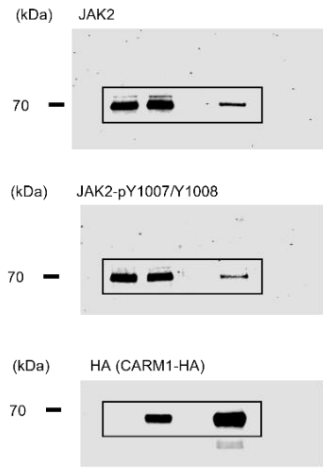

**Figure 2F**

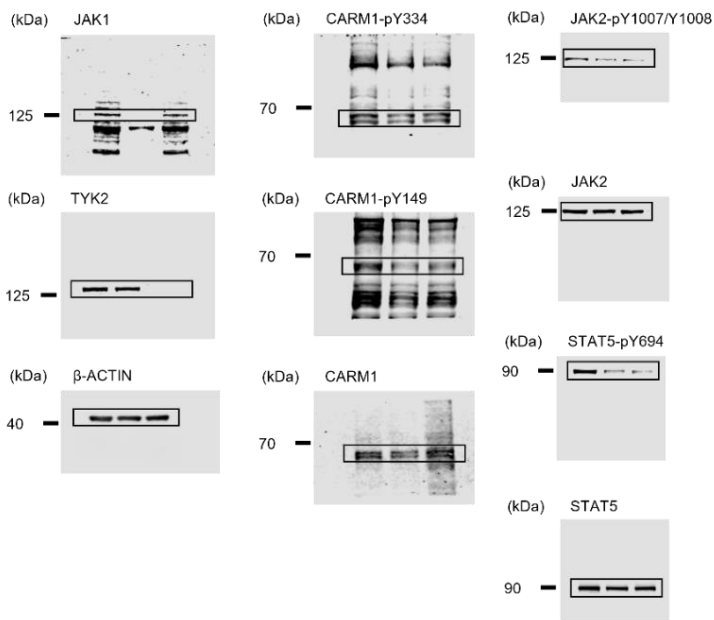

**Figure 2G**

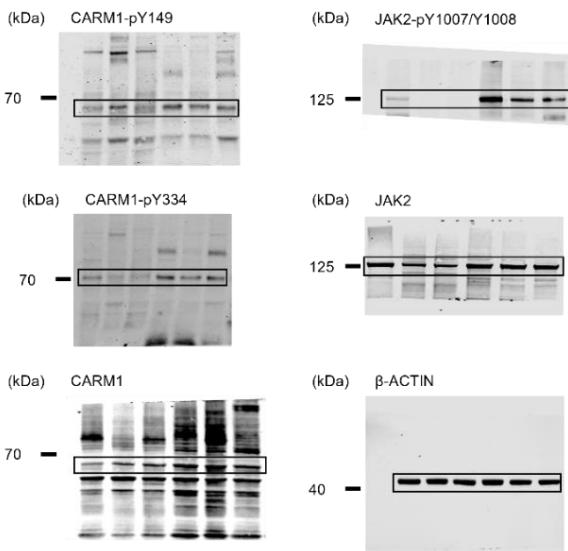

**Supplementary Figure 18. Uncropped scans from figure 3. The boxes indicate the cropped images.**

**Figure 3C**

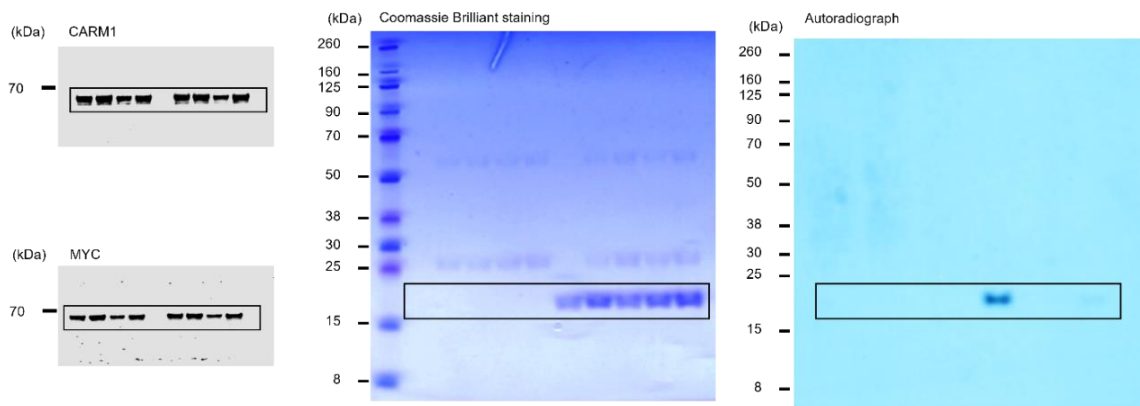

**Figure 3D**

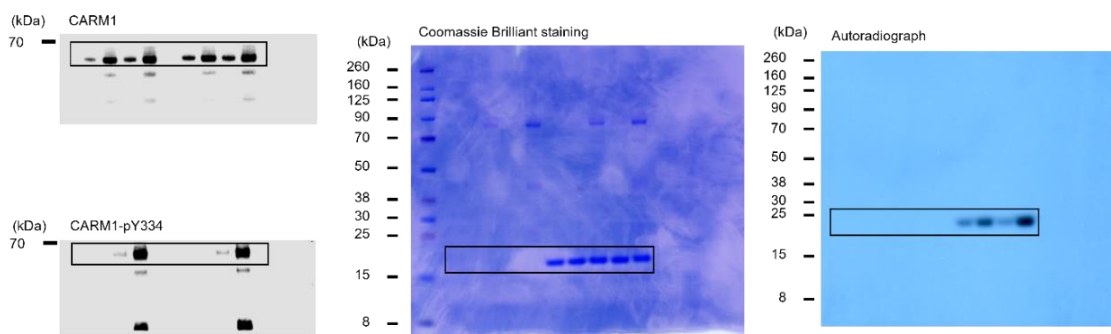

**Figure 3F**

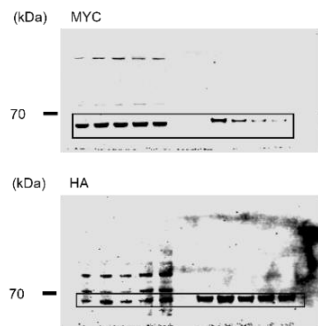

**Figure 3G**

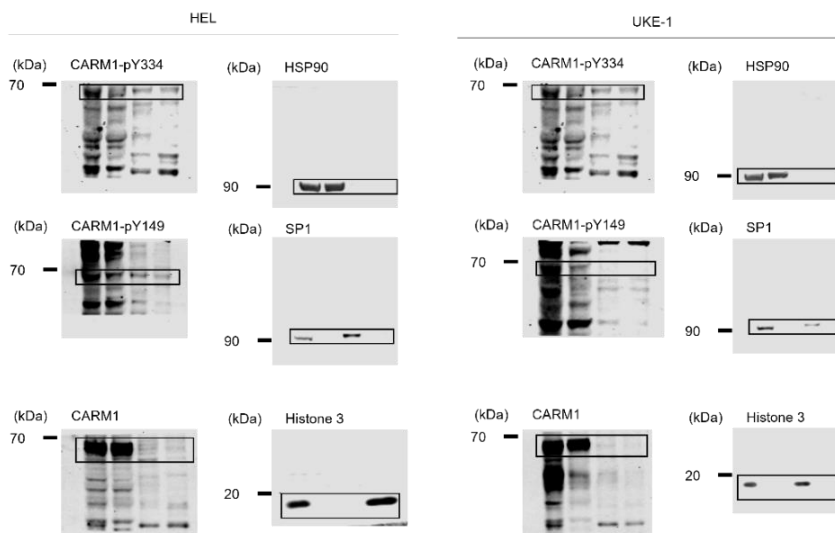

**Supplementary Figure 19. Uncropped scans from figure 4. The boxes indicate the cropped images.**

**Figure 4B**

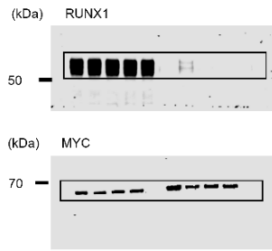

**Figure 4C**

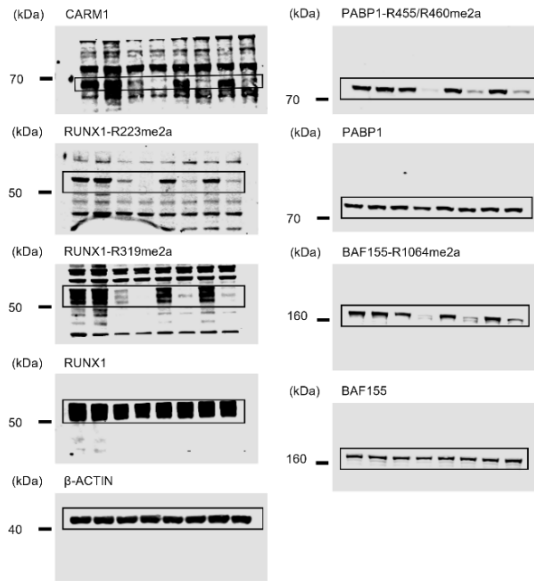

**Figure 4D**

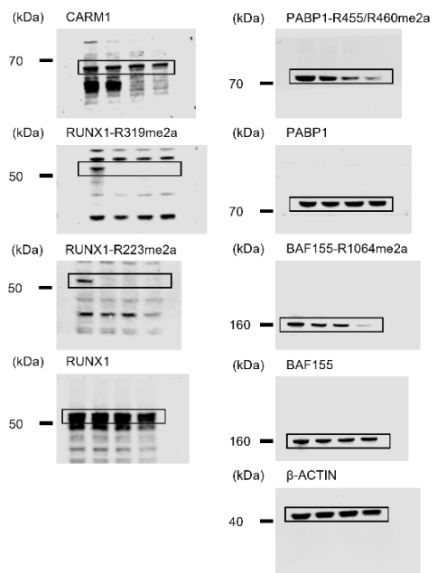

**Figure 4E**

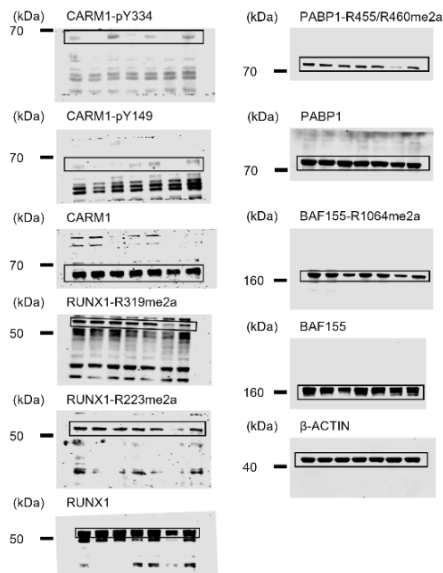

**Figure 4F**

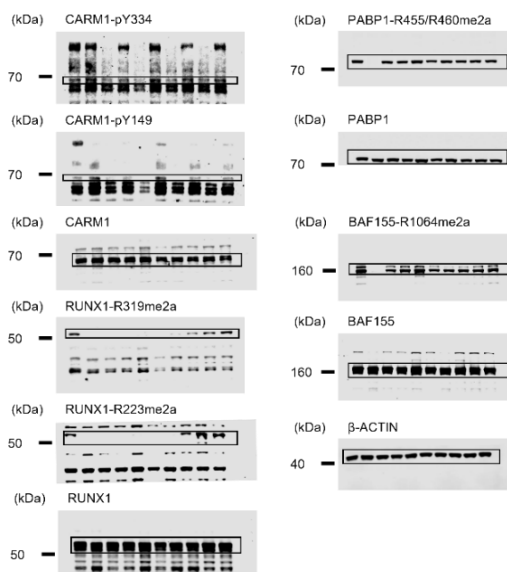

Supplementary Figure 20. Uncropped scans from figure 6. The boxes indicate the cropped images.

Figure 6A

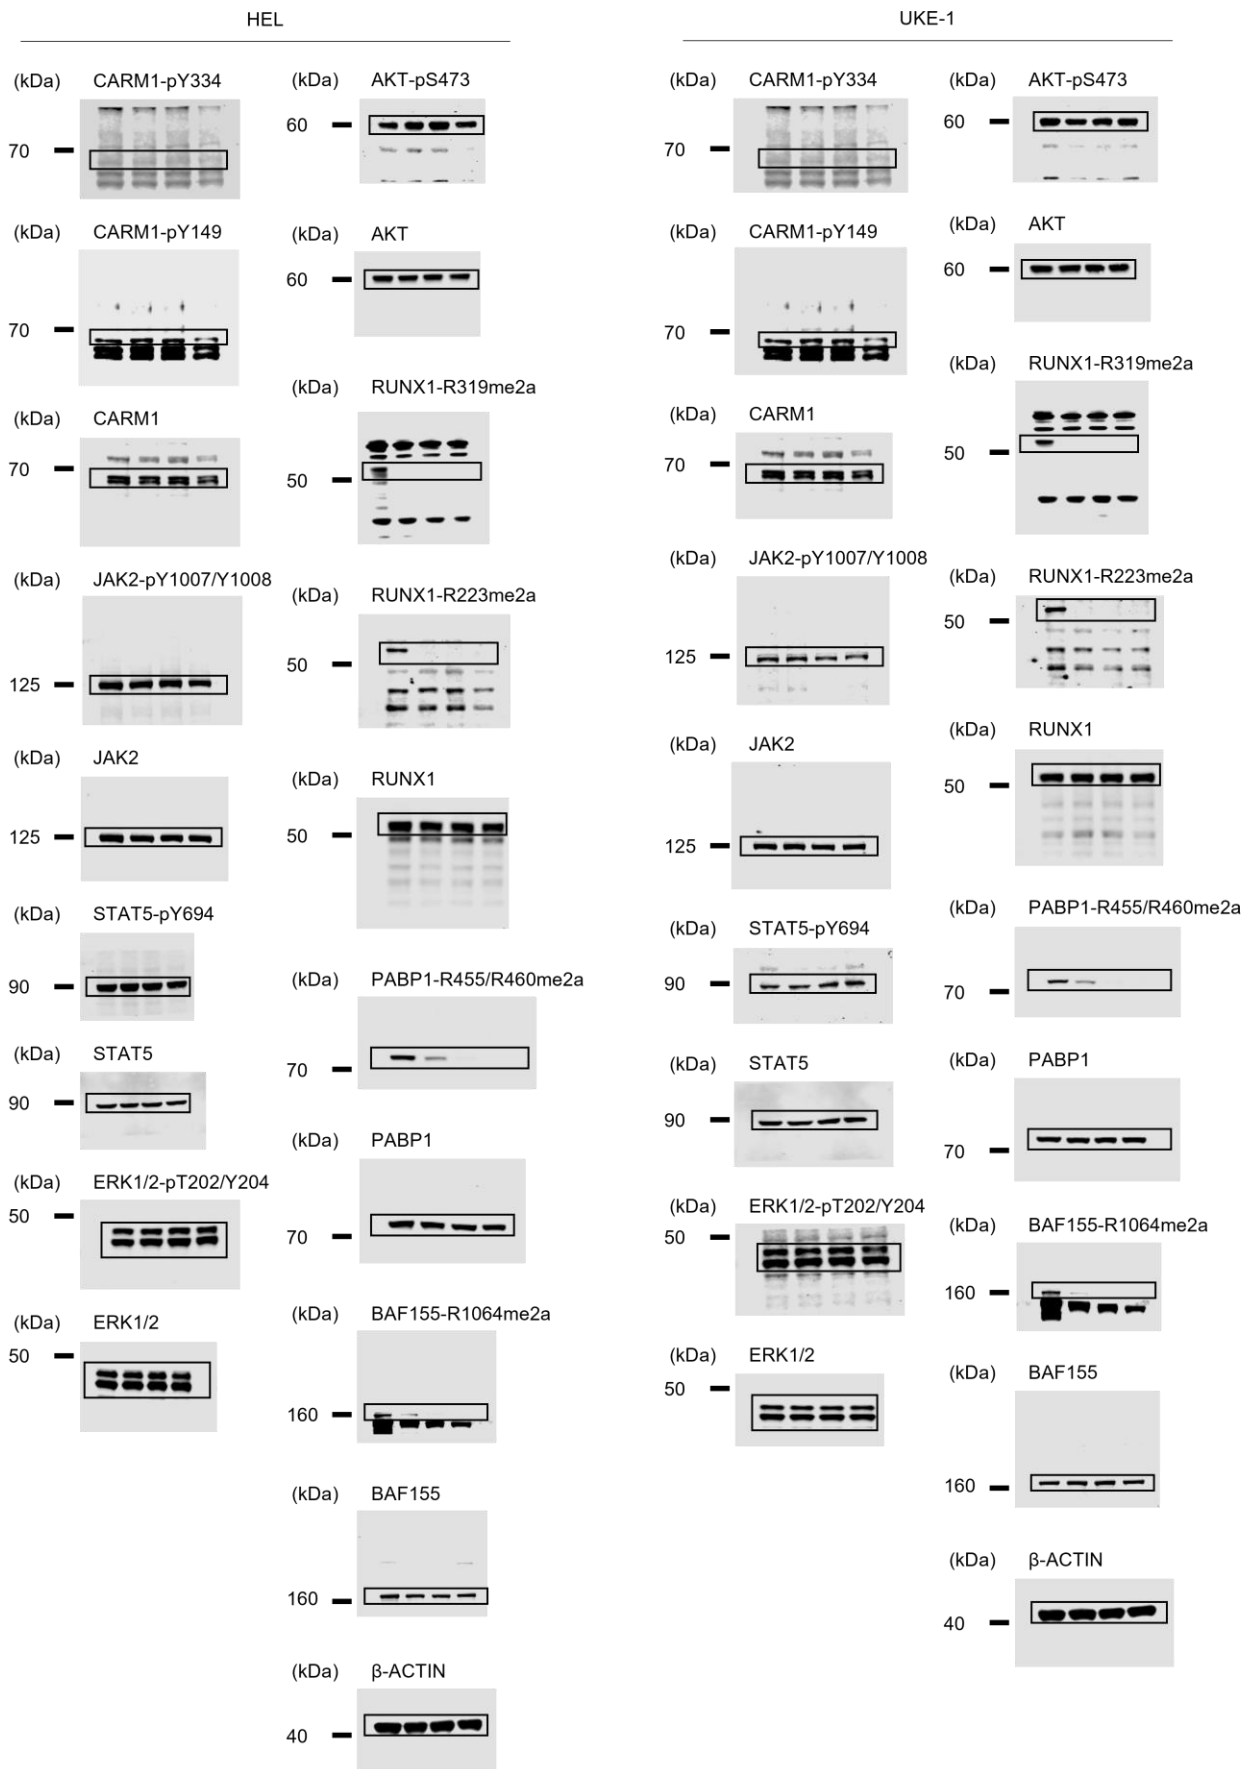



**Supplementary Figure 21. Uncropped scans from supplementary figure 2, 3, and 4. The boxes indicate the cropped images.**

**Figure S2B**

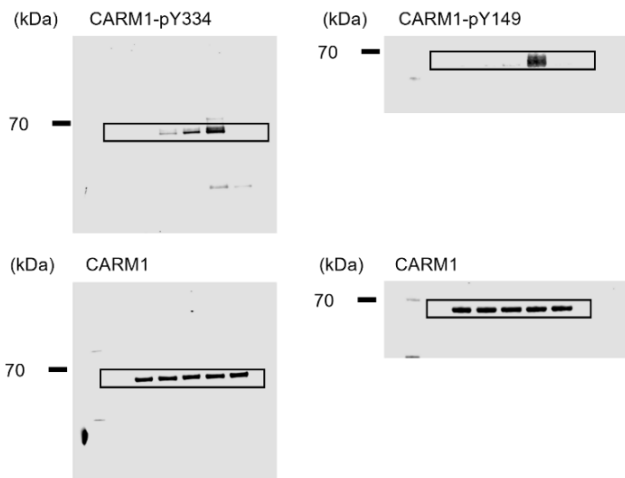

**Figure S2D**

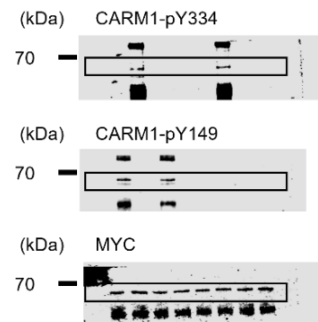

**Figure S2F**

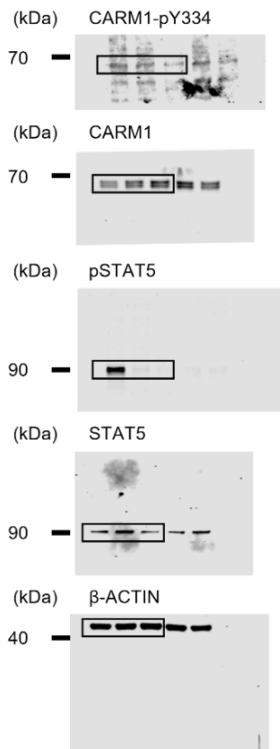

**Figure S3B**

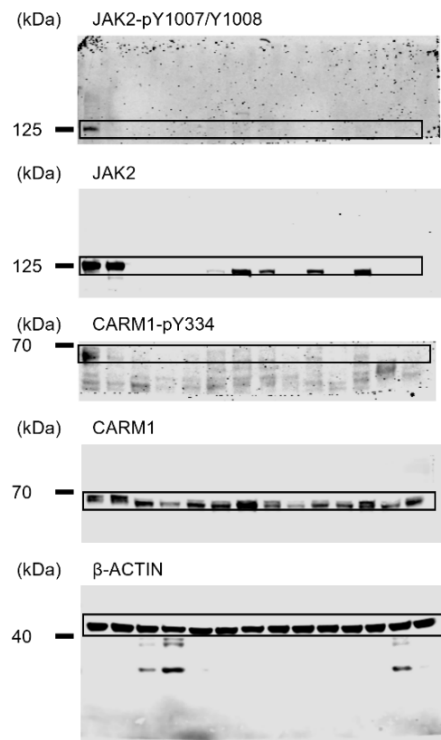

**Figure S3C**

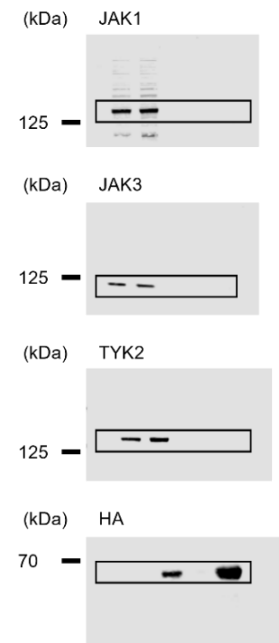

**Figure S4A**

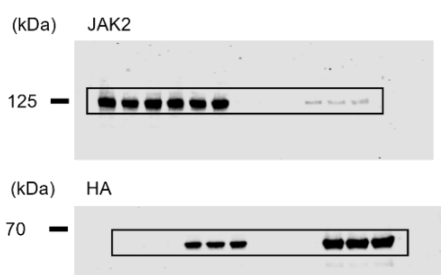

**Figure S4B**

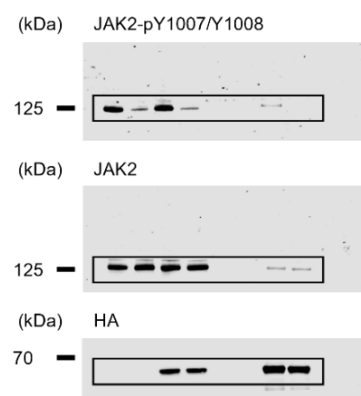

**Supplementary Figure 22. Uncropped scans from supplementary figure 6. The boxes indicate the cropped images.**

**Figure S6A**

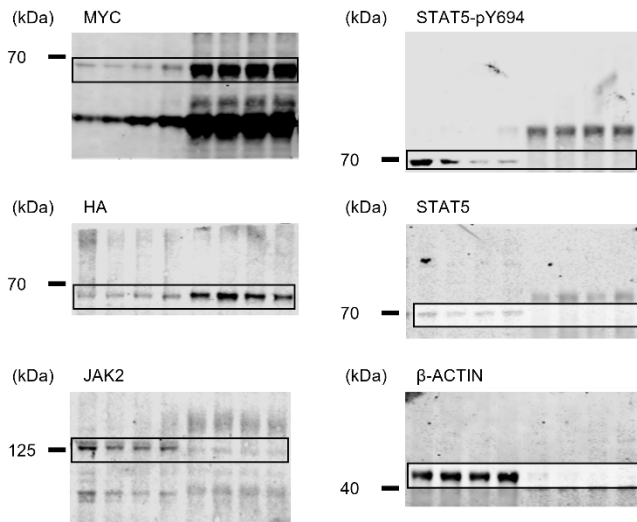

**Figure S6B**

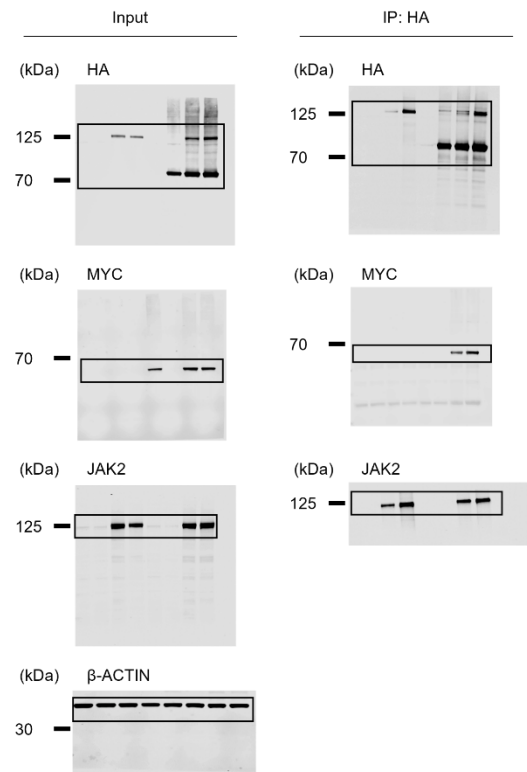

**Figure S6C**

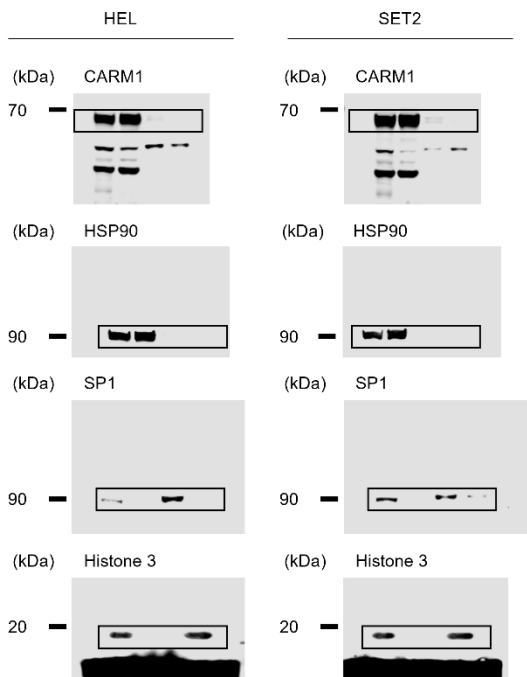

**Figure S6D**

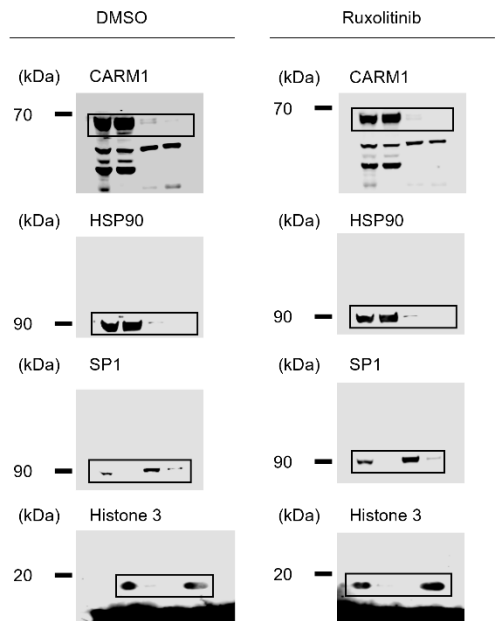

**Supplementary Figure 23. Uncropped scans from supplementary figure 9, 10, 11, and 16. The boxes indicate the cropped images.**

**Figure S9**

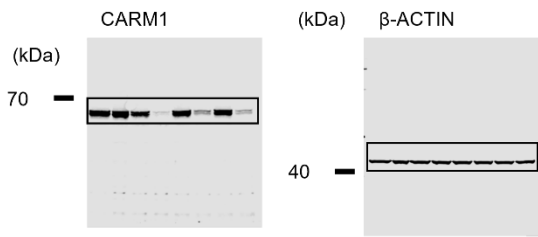

**Figure S16C**

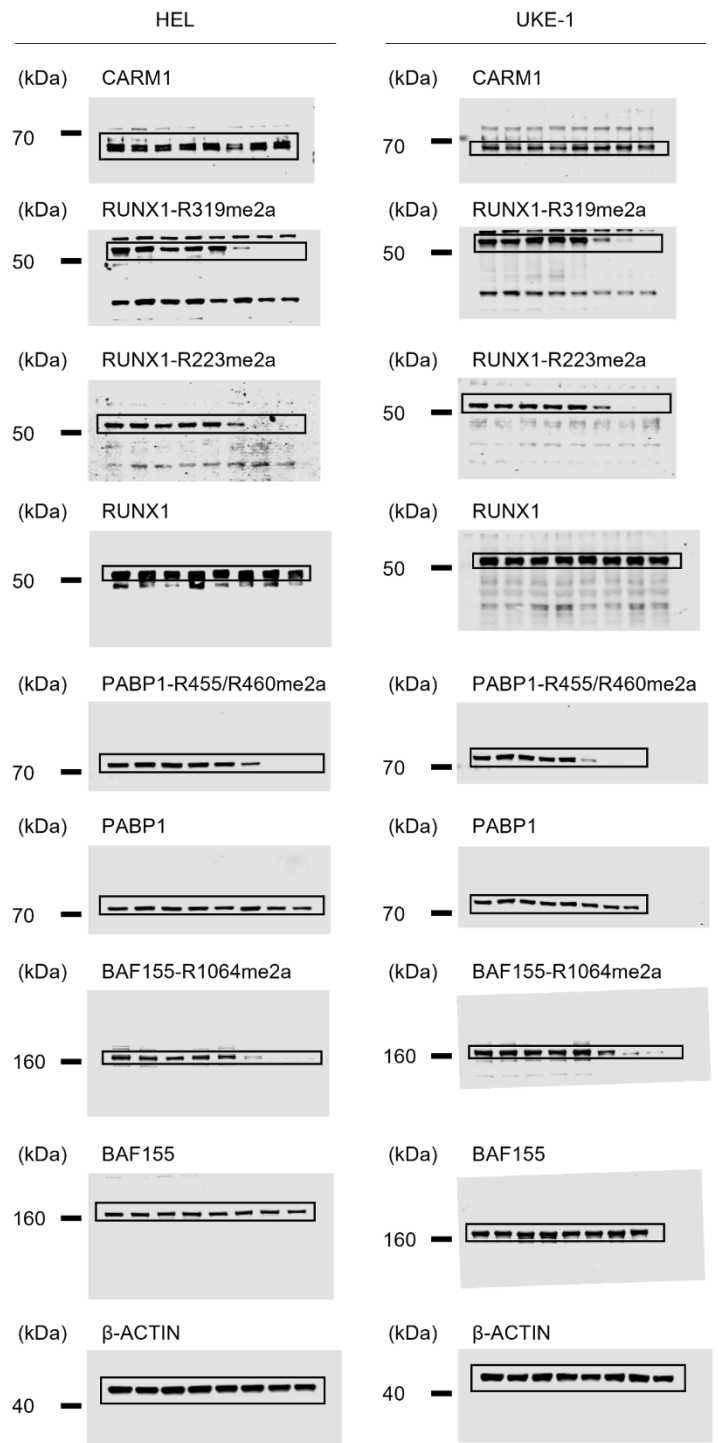

**Figure S10B**

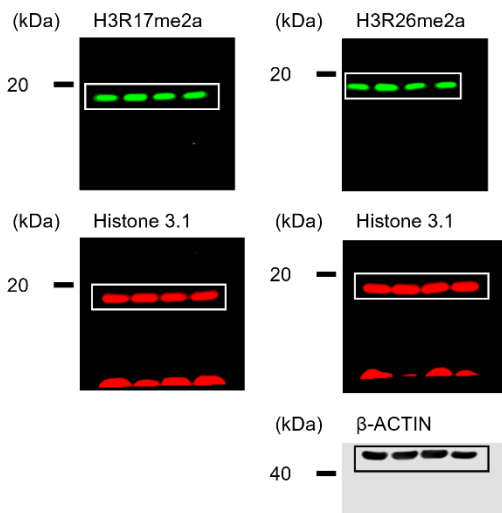

**Figure S11**

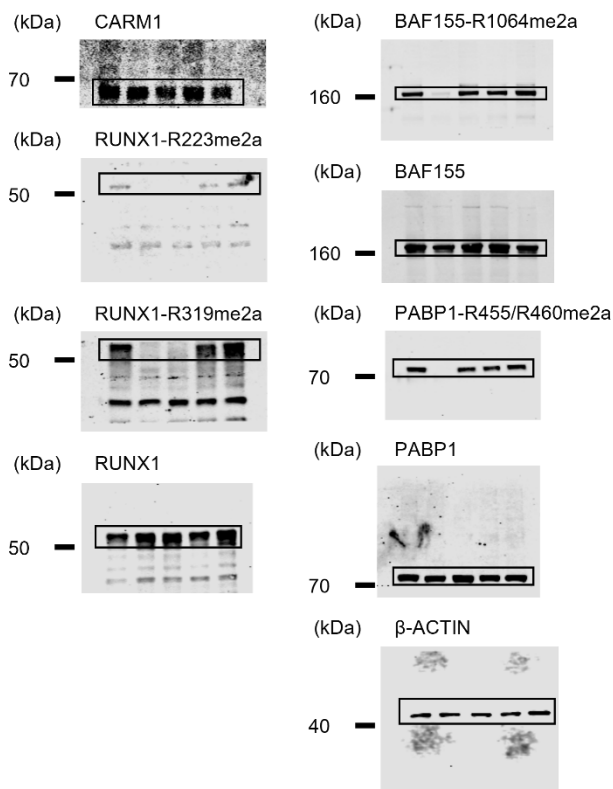

## 2. Supplementary Tables (Key resource table)

**Supplementary Table 1. Leukemia cell lines**

| Cell line        | Source  | Identifier                 |
|------------------|---------|----------------------------|
| Human: HEL       | ATCC    | TIB-180, RRID:CVCL_2481    |
| Human: SET2      | DSMZ    | ACC-608, RRID:CVCL_2187    |
| Human: MOLM-13   | DSMZ    | ACC-554, RRID:CVCL_RS50    |
| Human: MONO-MAC6 | DSMZ    | ACC-124, RRID:CVCL_1426    |
| Human: MV4-11    | ATCC    | CRL-9591, RRID:CVCL_0064   |
| Human: Kasumi-1  | ATCC    | CRL-2724, RRID:CVCL_0589   |
| Human: K562      | ATCC    | CCL-243, RRID:CVCL_0004    |
| Human: NB-4      | DSMZ    | ACC-207, RRID:CVCL_0005    |
| Human: NOMO-1    | DSMZ    | ACC-542, RRID:CVCL_1609    |
| Human: SKNO-1    | DSMZ    | ACC-690, RRID:CVCL_2196    |
| Human: OCI-AML3  | DSMZ    | ACC-582, RRID:CVCL_1844    |
| Human: TF-1      | ATCC    | CRL-2003, RRID:CVCL_0559   |
| Human: HL-60     | ATCC    | CCL-240, RRID:CVCL_A794    |
| Human: U937      | ATCC    | CRL-1593.2, RRID:CVCL_0007 |
| Human: UKE-1     | Coriell | RRID:CVCL_0104             |
| Human: CMK       | DSMZ    | ACC-392, RRID:CVCL_0216    |
| Human: M-07e     | DSMZ    | ACC-104, RRID:CVCL_2106    |

**Supplementary Table 2. Clinical information on myeloid neoplasm patient samples**

| UPN | Clinical diagnosis              | Sex    | <i>JAK2</i><br>mutational status<br>(VAF) | Gene mutational status                                                                                                                          |
|-----|---------------------------------|--------|-------------------------------------------|-------------------------------------------------------------------------------------------------------------------------------------------------|
| 1   | CML, blast phase                | Male   | Wild type                                 | <i>CCND3</i> (G8D),<br><i>MAP3K14</i> (L728P)                                                                                                   |
| 2   | AML with mutated<br><i>NPM1</i> | Female | Wild type                                 | <i>CBL</i> (R585H),<br><i>DNMT3A</i> (F414S),<br><i>IDH1</i> (R132H),<br><i>NF1</i> (T862S),<br><i>EZH2</i> (S84*),<br><i>NPM1</i> (W288Cfs*12) |
| 3   | AML not other<br>specified      | Male   | Wild type                                 | <i>DNMT3A</i> (I715Hfs*19),<br><i>TET2</i> (Y1148Ifs*4)                                                                                         |
| 4   | ET                              | Female | V617F mutation<br>(6%)                    | -                                                                                                                                               |
| 5   | PMF                             | Male   | V617F mutation<br>(36%)                   | <i>TP53</i> (R248Q),<br><i>U2AF1</i> (Q157P),<br><i>ZRSR2</i> (R169*)                                                                           |
| 6   | PV                              | Female | V617F mutation<br>(95%)                   | -                                                                                                                                               |

Abbreviations: UPN, unique patient number; VAF, variant allele frequency; CML, chronic myeloid leukemia; AML, acute myeloid leukemia; ET, essential thrombocythemia; PMF, primary myelofibrosis; PV, polycythemia vera.

**Supplementary Table 3. Human CARM1 shRNAs**

| shRNA for CARM1                           | Source          | Identifier |
|-------------------------------------------|-----------------|------------|
| Human CARM1-KD #1: TTTGTGTAAAATATGGCAGCGA | RNAi Core MSKCC | N/A        |
| Human CARM1-KD #2: TTCAGGTACTTCTTGGCGTGGA | RNAi Core MSKCC | N/A        |
| Human CARM1-KD #3: TAAAGGAATCAGGTTGTTGTGG | RNAi Core MSKCC | N/A        |

**Supplementary Table 4. Human sgRNAs**

| sgRNA                                            | Source   | Identifier |
|--------------------------------------------------|----------|------------|
| Human CARM1-Y334F knock-in: TTCTGCCGTGCAGTACTTCC | Synthego | N/A        |
| Human CARM1-Y149F knock-in: CCGCGGTGGATGAGTATTTC | Synthego | N/A        |
| Human JAK1 knockout: CATCTTGTCATCAACGGTGA        | Synthego | N/A        |
| Human TYK2 knockout: TTGGGCCTGAGCATCGAAGA        | Synthego | N/A        |

**Supplementary Table 5. Recombinant peptides and proteins**

| Proteins     | Source              | Identifier |
|--------------|---------------------|------------|
| JAK2         | Abcam               | ab42619    |
| Histone H3.1 | New England Biolabs | M2503S     |
| PAK1         | Abcam               | ab177574   |
| CARM1        | Reaction Biology    | HMT-11-120 |
| PRMT5        | Reaction Biology    | HMT-21-172 |
| RUNX1b       | MyBioSource         | MBS1471613 |

**Supplementary Table 6. Antibodies for immunoblotting**

| Antibodies                              | Source                    | Identifier  | Dilution rate |
|-----------------------------------------|---------------------------|-------------|---------------|
| Phosphotyrosine (clone 4G10)            | Millipore Sigma           | 05-321X     | 1:1,000       |
| Glutathione-S-Transferase (GST)         | Sigma-Aldrich             | G7781       | 1:2,000       |
| CARM1                                   | Bethyl Laboratories       | A300-420A   | 1:1,000       |
| BAF155                                  | Santa Cruz Biotechnology  | sc-365543   | 1:1,000       |
| Asymmetric-dimethyl BAF155 Arg1064      | Millipore                 | ABE1339     | 1:1,000       |
| PABP1 (clone 10E10)                     | Abcam                     | ab6125      | 1:1,000       |
| Asymmetric-dimethyl PABP1 Arg455/Arg460 | Cell Signaling Technology | 3505S       | 1:1,000       |
| $\beta$ -ACTIN (clone N-21)             | Santa Cruz Biotechnology  | sc-130656   | 1:15,000      |
| JAK2 (mouse monoclonal) (clone 8E10.2)  | EMD Millipore             | 04-001      | 1:1,000       |
| JAK2 (rabbit polyclonal)                | Cell Signaling Technology | 3230S       | 1:1,000       |
| Phosphorylated JAK2 Tyr1007/Tyr1008     | Cell Signaling Technology | 3771S       | 1:1,000       |
| STAT5                                   | Cell Signaling Technology | 4807S       | 1:1,000       |
| Phosphorylated STAT5 Tyr694             | Cell Signaling Technology | 9359S       | 1:1,000       |
| ERK1/2                                  | Cell Signaling Technology | 4695S       | 1:1,000       |
| Phosphorylated ERK1/2 Thr202/Tyr204     | Cell Signaling Technology | 9101S       | 1:1,000       |
| AKT                                     | Santa Cruz Biotechnology  | sc-81434    | 1:1,000       |
| Phosphorylated AKT Ser473               | Cell Signaling Technology | 4058S       | 1:1,000       |
| JAK1                                    | EMD Millipore             | 06-272      | 1:1,000       |
| JAK3                                    | Cell Signaling Technology | 3775S       | 1:1,000       |
| TYK2                                    | Cell Signaling Technology | 9312S       | 1:1,000       |
| Histone 3                               | Abcam                     | ab24834     | 1:1,000       |
| HSP90                                   | ORIGENE                   | TA500494    | 1:2,000       |
| SP1                                     | Cell Signaling Technology | 5931S       | 1:1,000       |
| RUNX1 (mouse monoclonal)                | Santa Cruz Biotechnology  | sc-365644   | 1:500         |
| RUNX1 (rabbit polyclonal)               | Cell Signaling Technology | 8229S       | 1:1,000       |
| HA Epitope Tag Antibody                 | Rockland                  | 600-445-384 | 1:1,000       |
| MYC Epitope Tag Antibody                | Rockland                  | 600-445-381 | 1:1,000       |
| Streptavidin                            | LI-COR                    | 926-32230   | 1:1,000       |

**Supplementary Table 7. TaqMan primers in quantitative RT-PCR**

| Primer | Source                   | Identifier    |
|--------|--------------------------|---------------|
| CARM1  | Thermo Fisher Scientific | Hs00406354_m1 |
| HPRT1  | Thermo Fisher Scientific | Hs01003267_m1 |
| BMI-1  | Thermo Fisher Scientific | Hs00995536_m1 |
| CD34   | Thermo Fisher Scientific | Hs00990732_m1 |
| ID2    | Thermo Fisher Scientific | Hs0074379_m1  |
| MIR144 | Thermo Fisher Scientific | Hs04231506_s1 |
| SATB1  | Thermo Fisher Scientific | Hs00962580_m1 |
| BCL2   | Thermo Fisher Scientific | Hs01048932_g1 |
| BCL2A1 | Thermo Fisher Scientific | Hs06637395_s1 |
| SMAD3  | Thermo Fisher Scientific | Hs00969210_m1 |
| CCND2  | Thermo Fisher Scientific | Hs00153380_m1 |
| KIF5B  | Thermo Fisher Scientific | Hs01037194_m1 |
| MIR223 | Thermo Fisher Scientific | Hs04333910_s1 |

**Supplementary Table 8. Chemicals**

| Proteins    | Source                  | Identifier |
|-------------|-------------------------|------------|
| Ruxolitinib | Cayman Chemical Company | 11609      |
| EPZ025654   | Epizyme                 | N/A        |
| CPZ868      | MedChemExpress          | HY-18960   |



### **3. Supplementary reference**

1. Matsumoto N, Mori S, Hasegawa H, Sasaki D, Mori H, Tsuruda K, et al. Simultaneous screening for JAK2 and calreticulin gene mutations in myeloproliferative neoplasms with high resolution melting. *Clinica Chimica Acta*. 2016;462:166-173.
